# 1 **Full Title:** Learning efficient representations of environmental priors in 2 working memory

## 3 **Short Title:** Parametric learning in working memory

4 Tahra L Eissa<sup>1,\*</sup> and Zachary P Kilpatrick<sup>1,2</sup>

5 <sup>1</sup>Department of Applied Mathematics, University of Colorado Boulder, Boulder, CO, USA.

6 <sup>2</sup>Institute of Cognitive Science, University of Colorado Boulder, Boulder, CO, USA.

7 \*corresponding author: [tahra.eissa@colorado.edu](mailto:tahra.eissa@colorado.edu)

## 8 **Abstract**

9 Experience shapes our expectations and helps us learn the structure of the environment. Inference models render such  
10 learning as a gradual refinement of the observer's estimate of the environmental prior. For instance, when retaining an  
11 estimate of an object's features in working memory, learned priors may bias the estimate in the direction of common  
12 feature values. Humans display such biases when retaining color estimates on short time intervals. We propose that  
13 these systematic biases emerge from modulation of synaptic connectivity in a neural circuit based on the experienced  
14 stimulus history, shaping the persistent and collective neural activity that encodes the stimulus estimate. Resulting neu-  
15 ral activity attractors are aligned to common stimulus values. Using recently published human response data from a  
16 delayed-estimation task in which stimuli (colors) were drawn from a heterogeneous distribution that did not necessarily  
17 correspond with reported population biases, we confirm that most subjects' response distributions are better described by  
18 experience-dependent learning models than by models with no learned biases. This work suggests that systematic lim-  
19 itations in working memory reflect efficient representations of inferred environmental structure, providing new insights  
20 into how humans integrate environmental knowledge into their cognitive strategies.

## 21 **Introduction**

22 Traditional descriptions of working memory, a core feature of cognition [1], conceive of a system that takes in, maintains,  
23 and computes information over short timescales without a constant source of input. Knowing the limitations of this  
24 system can help identify its role in cognition [2] and provide a bridge to developing relevant neural theories. The limits  
25 and biases of working memory can be measured by the statistics of recall errors after a delay, for instance, in a visual  
26 delayed response task [3]. In these tasks, humans are asked to recall object features, such as location, color, or shape, a

27 short time after presentation [2,4–6]. When feature values lie on a continuum, subject responses do as well, giving finely  
28 resolved measurements of the direction and magnitude of errors on each trial [7, 8]. For example, people’s responses  
29 on delayed-response tasks often exhibit error magnitudes that increase roughly linearly with time, comparable to the  
30 variance of a diffusion process [9, 10], providing a metric that can guide neural theories for working memory.

31 Complementary to behavioral studies of working memory, theories describing how the brain encodes information  
32 over short periods of time provide mechanistic insight. One well-validated theory associates remembered stimulus val-  
33 ues with persistent neural activity in recurrently coupled excitatory neurons that are preferentially tuned to the target  
34 values [11]. Broadly tuned inhibitory neurons driven by excitation stabilize this activity into a localized structure called  
35 an activity *bump* [12, 13]. Variability in neural tuning and synaptic connectivity can cause this activity bump to wander  
36 about feature space, causing trial-by-trial errors and biases often perceived as limitations to the system [14–16]. For  
37 example, delayed estimates may exhibit serial bias, whereby stimulus values from previous trials may attract or repel  
38 the retained memory of the most recent stimulus value [17]. Analogous attractive biases emerge when subjects retain  
39 the values of multiple stimuli within a single trial [18]. Additionally, subjects may exhibit systematic biases that include  
40 preferences for focal colors [16, 19], orientations [20] and cardinal directions [21].

41 While biases are often considered reflections of suboptimality, they can be advantageous when reflecting the structure  
42 of the environment or sequences of stimuli the subject might see [22, 23]. There is ample evidence that the working  
43 memory system can be trained, and such biases may be the result of long-term learning [24]. Mechanistically, systematic  
44 biases in stimulus coding or delayed estimates could emerge from variation in the sensitivity of stimulus feature tuning  
45 across neurons [6,25,26]. Alternatively, the strength of synaptic connectivity may vary systematically so collective neural  
46 activity is biased to specific conformations in the network [27]. Such heterogeneity in the spatial organization of synaptic  
47 connectivity can reduce error by maintaining representations that are less susceptible to noise perturbations [28–30].  
48 Thus, if synaptic heterogeneity reflects the expected distribution of stimulus values, recall of common features would be  
49 less error prone, improving cognitive efficiency [31].

50 Since certain stimulus features may be overrepresented in the natural world (e.g., green/brown colors are more  
51 common in a forest; see also [32, 33]), we propose that subjects’ systematic biases could result from learning the natural  
52 distribution of specific features of the environment, which modulates synaptic connectivity to produce representation  
53 biases. Here, we model the effects of environmental feature distributions on delayed estimation in neural circuit models  
54 and their low-dimensional reductions, considering both models with network connectivity that is fixed and those shaped  
55 by long-term plasticity. We compare these results to human behavior and find that most subjects exhibit strategies best  
56 described by learning models, supporting the hypothesis that long-term representation biases are the result from learning  
57 environmental structure.

## 58 Results

We begin with the premise that features of natural environments appear according to distributions that favor particular values that are overrepresented and thus, statistically more likely to occur (Fig. 1a). Such parametric distributions could

take on general forms [26], but for illustration, we assume a parametric prior that is periodic with peaks (dips) at common (rare) stimulus values

$$P_{\text{env}}(\theta) = e^{A \cos(m\theta)},$$

59 where  $\theta$  corresponds with a particular feature value described on a ring (e.g., one feature dimension wraps periodically),  
 60  $A$  describes the amplitude, and  $m$  describes the number of peaks in the probability distribution. This periodic function  
 61 resembles the color biases displayed by humans in [16] as well as cardinal bias common to angle and direction esti-  
 62 mates [20, 21]. Note, unless otherwise stated, all subsequent results assume that  $m = 4$ , so the peaks are centered at  
 63 cardinal angles of  $\theta$ , and  $\theta$  is in radians in formulas, but plotted in degrees in figures for readability.

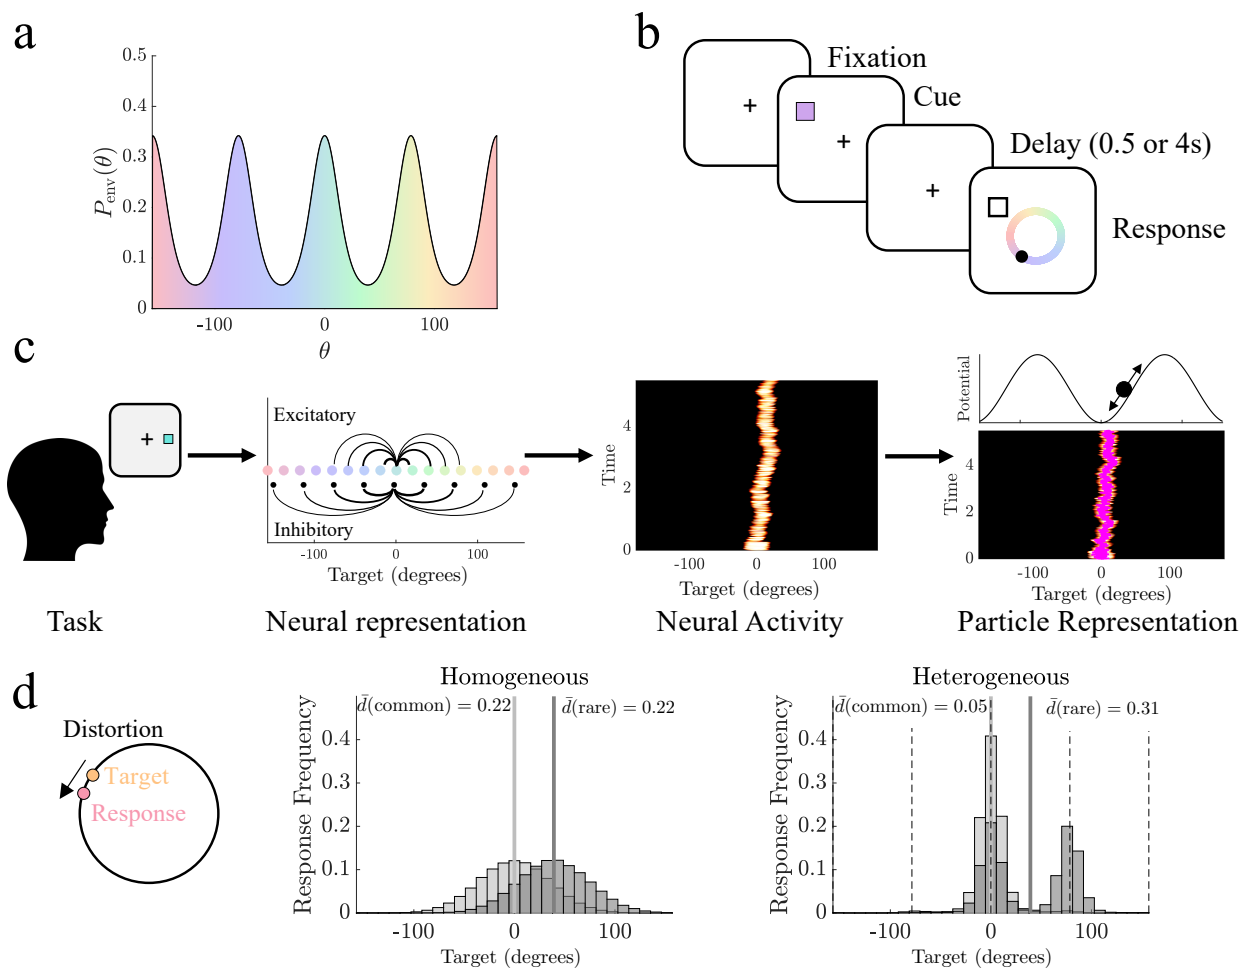

Figure 1: Heterogeneity in the distribution of environmental features is reflected in delayed estimates. **a.** Natural environments that include overrepresented features, such as certain colors, are described by heterogeneous priors of feature distributions with peaks at the overrepresented features. **b.** Schematic of the delayed estimation task, which requires subjects to remember a target feature (e.g., color) and report it following a short delay period. **c.** The remembered target feature is represented neuromechanistically by a subpopulation of stimulus-specific excitatory neurons with local recurrent excitatory and broad inhibition. The target representation is retained as a bump of sustained neural activity wandering stochastically during the delay. Bump dynamics can be projected to a particle model describing its stochastically evolving position: Spatial heterogeneity in synaptic connectivity is inherited by the particle model as a nontrivial energy landscape with attractors corresponding to regions of enhanced excitation. **d.** Distortion, the circular distance between the target and responses, is influenced by synaptic heterogeneity. In homogeneous networks, response errors at common environmental targets ( $\theta = 0$ , light grey) and rare targets ( $\theta = 45$ , dark grey) are equivalent, giving the same local mean distortion ( $\bar{d}(\theta)$ ). With synaptic heterogeneity matched to the environmental prior  $P_{\text{env}}(\theta)$ , errors are reduced near common stimulus feature values (dashed lines). Parameters used as listed in Methods Table 1.

64 Our models describe the maintenance of estimates of continuous features [34, 35], arising in tasks where an observer  
65 is briefly shown a number of items and, after a delay, probed about remembered stimulus feature values (e.g., location,  
66 orientation, or color). These models allow us to theorize how the true priors on the environmental features impact (and  
67 potentially bias) how stimulus feature values are remembered (Fig. **1b**). To illustrate, we focus on examples in which  
68 subjects recall colors, though equivalent results can be produced for models of orientation and location recall. Our  
69 models are motivated by previous observations that show human performance on delayed estimation tasks degrades over  
70 time, such that response variance increases roughly linearly, suggesting a diffusive process drives memory errors [9].  
71 Such diffusive degradation of a stimulus estimate has been modeled in neural circuits as a localized region of persistent  
72 activity (bump) that stochastically wanders feature space due to neural and synaptic fluctuations [11, 36]. Activity bumps  
73 emerge from strong stimulus-tuned recurrent excitation paired with broad stabilizing inhibition, which generates self-  
74 sustained activity [12]. Spatial variation in synaptic connectivity can shape the preferred locations (attractors) of the  
75 bump, introducing drift toward attractors.

76 Since the location of the activity bump is a proxy for the remembered stimulus feature value [14, 15], we can simplify  
77 our analysis of the impact of activity bump fluctuations by considering low-dimensional models that describe the bump  
78 as a particle stochastically moving through an energy landscape (Fig. **1c**). Spatial variations in synaptic connectivity are  
79 thus accounted by the resulting energy landscape (and bump drift) they invoke [28, 29, 37] and can be derived asymp-  
80 totically [37, 38], making it a useful simplification of delayed estimate dynamics. Energy landscapes can be updated to  
81 represent an observer's current estimate of the environmental feature distribution  $P_{\text{env}}(\theta)$  (see Methods) and can be more  
82 easily fit to response data than neural circuit models [14, 16, 23, 39], providing a tractable model for studying the origins  
83 of systematic biases in working memory.

84 We compute our models' average error between a true target feature value  $\theta$  and its estimate as the mean distortion  
85  $\bar{d}(\theta)$ , the circular distance between the target and responses. Overall error across all target values is computed as the total  
86 mean distortion  $\bar{d}_{\text{tot}} = \int_{-\pi}^{\pi} \bar{d}(\theta) P_{\text{env}}(\theta) d\theta$  [15, 29]. Thus, when synaptic connectivity (and the corresponding energy  
87 landscape) is aligned with the environmental prior  $P_{\text{env}}(\theta)$ , the mean distortion is reduced at common target feature  
88 values  $\bar{d}(\text{common})$  but increased for rare values  $\bar{d}(\text{rare})$ . In contrast, purely distance-dependent synaptic connectivity  
89 (and a flat energy landscape) produces response distributions and mean distortion that are similar for common and rare  
90 target feature values (Fig. **1d**), making mean distortion a useful metric for quantifying error with respect to changes in  
91 synaptic connectivity.

92 Combining analysis of the energy landscapes with our distortion metric, we now systematically consider the impacts  
93 of environmental stimulus distributions on working memory responses, which can guide our understanding of how ex-  
94 pectations about the environmental prior can be learned from experience and how these expectations can lead to more  
95 efficiently retained memories.

96 Energy Landscapes Shape Recall Distortion

97 Uniform Stimulus Priors

We consider a particle model that describes the stochastically evolving estimate of the target feature value with an energy landscape that can incorporate bias, introduced by breaking the symmetry of continuous attractor models of delayed estimation [40]. This low-dimensional model can be derived asymptotically from the stochastic evolution of the position  $\theta(t)$  of an activity bump that encodes the estimate and the information about the prior in its network connectivity (see Methods). The energy landscape that reflects an observer's long-term estimate of the periodically-varying environmental prior  $P_{\text{env}}(\theta)$  can be generated as

$$U(\theta) = -A_p \cos(n\theta), \quad (1)$$

98 where  $A_p$  describes the well amplitude and  $n$  is the number of attractors (each located at the believed common environ-  
 99 mental feature values). This simple form for  $U(\theta)$  allows us to probe how the alignment of the energy landscape to the  
 100 true stimulus distribution shapes an observer's distortion and produces response biases (Fig. 2a).

The movement of the particle through this landscape evolves according to the stochastic differential equation

$$d\theta(t) = -U'(\theta(t))dt + \sigma dW(t), \quad (2)$$

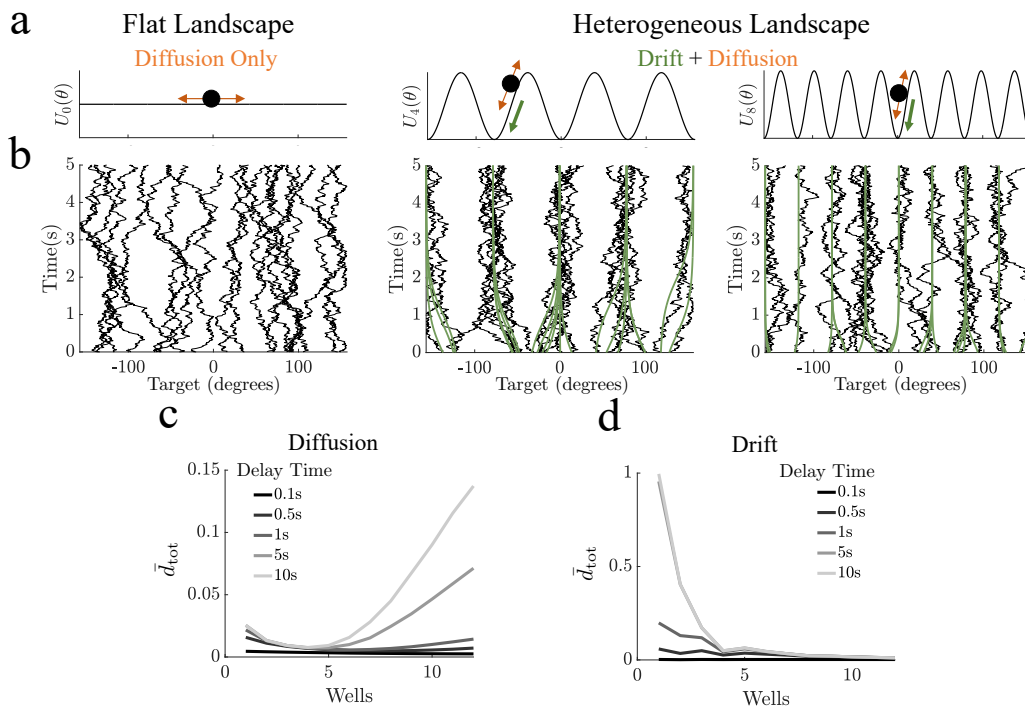

Figure 2: Particles in heterogeneous landscapes are drawn toward attractors. **a.** Schematics of the flat (homogeneous) landscape, with only diffusion, and heterogeneous landscapes, with potential-driven drift and diffusion. **b.** Example of particle trajectories in the flat and heterogeneous energy landscapes in **a**, sampled from a uniform environmental distribution. In the flat energy landscape, particle motion is driven purely by diffusion. In the heterogeneous energy landscapes, the particle drifts toward attractors over time but diffusion can cause the particle to "jump" wells. Drift-only process shown in green for comparison. **c.** Total mean distortion in a heterogeneous landscape with only diffusion (targets sampled at attractor points) and moderate diffusion ( $\sigma = 0.05$ ). **d.** Total mean distortion in a heterogeneous landscape with only drift. Parameters for all sub-figures:  $A_p = 0, 1, n = 4, 8$ , all others as listed in Methods Table 1.

101 where the particle evolves as it: 1. descends wells surrounding attractors (drift), and 2. diffuses due to noise fluctuations  
102 given by  $W(t)$ , a Wiener process. Considering a particle model with a flat energy landscapes ( $A_p \equiv 0$ ), memory of  
103 the target stimulus feature evolves according to pure diffusion during the delay period. In contrast, particles evolving  
104 along non-trivial energy landscapes ( $A_p > 0$ ) are biased toward the periodically placed attractors at  $\theta = \pm(j/n)\pi$   
105 ( $j = 0, \dots, n - 1$ ) (Fig. **2b**).

106 We first quantify the total mean distortion  $\bar{d}_{\text{tot}}$  of responses from particle models encoding stimuli from a uniform  
107 prior. Even given a uniform environmental prior, delayed estimates can be improved due to the stabilizing effects of  
108 local attractors that mitigate the wandering from diffusion [28, 29, 41]. However, distortion of the target estimate is  
109 also enhanced by the introduction of drift. Therefore, we consider the individual contributions of diffusion and drift to  
110 the total mean distortion. Fixing the diffusion coefficient and sampling responses that only originate at attractor points  
111 (wells, e.g.,  $\theta = 0$ ), we assess the impact of diffusion alone in heterogeneous energy landscapes ( $n > 0$ ). Distortion  
112 varies non-monotonically with the number of wells (Fig. **2c**). This relationship is enhanced with longer delays and  
113 can be attributed to the close proximity of nearby wells as the well number ( $n$ ) increases, reducing the strength of  
114 perturbation needed for the particles to ‘jump’ between attractors (see also Fig. **S1** and [29, 42]). Low (high) levels of  
115 diffusion correspondingly show reduced (enhanced) total mean distortion (Fig. **S2**). In contrast, when we remove noise  
116 so particles in heterogeneous landscapes only drift, total mean distortion decreases considerably as the number of wells  
117 increases (Fig. **2d**), indicating reduced distortion is due primarily to the the constraint of diffusion by attractors.

## 118 Heterogeneous Stimulus Priors

119 In addition to the form of the energy landscape, mean distortion is impacted by the form of the environmental prior  
120  $P_{\text{env}}(\theta)$ . While the conditional probability of responses  $P(\theta_{\text{resp}}|\theta_{\text{env}})$  is only altered by heterogeneity in the energy  
121 landscape, the marginal probability of response  $P(\theta_{\text{resp}})$  is impacted by both the energy landscape and the environmental  
122 prior (Fig. **S3**), confirming that the mean distortion changes with the environmental prior. Matching the number and  
123 position of energy landscape wells to the peaks in the prior, we find the mean distortion  $\bar{d}(\theta)$  is significantly reduced at  
124 common (attractor) locations compared to a model with a flat energy landscape, but shows comparable levels of distortion  
125 at rare (saddle) locations (Fig. **3a**; bootstrapped distortion,  $p < 0.05$ ).

126 We ask if the total mean distortion typically decreases for periodic energy landscapes Eq. (1) as compared to flat  
127 landscapes when environmental priors are heterogeneous, and find that it is generally reduced (relative distortion is  
128 negative), with a dramatic reduction in distortion when attractors are aligned with peaks in the prior (Fig. **3b**), though  
129 the number of wells does not need to exactly match the number of peaks (Fig. **S4**). Energy landscapes misaligned with  
130 the environmental prior (e.g., aligned with rare target locations) generally produced response distributions with higher  
131 total mean distortion than aligned models (Fig. **S5**), confirming that aligning attractors to environmental peaks increases  
132 coding accuracy of delayed estimates.

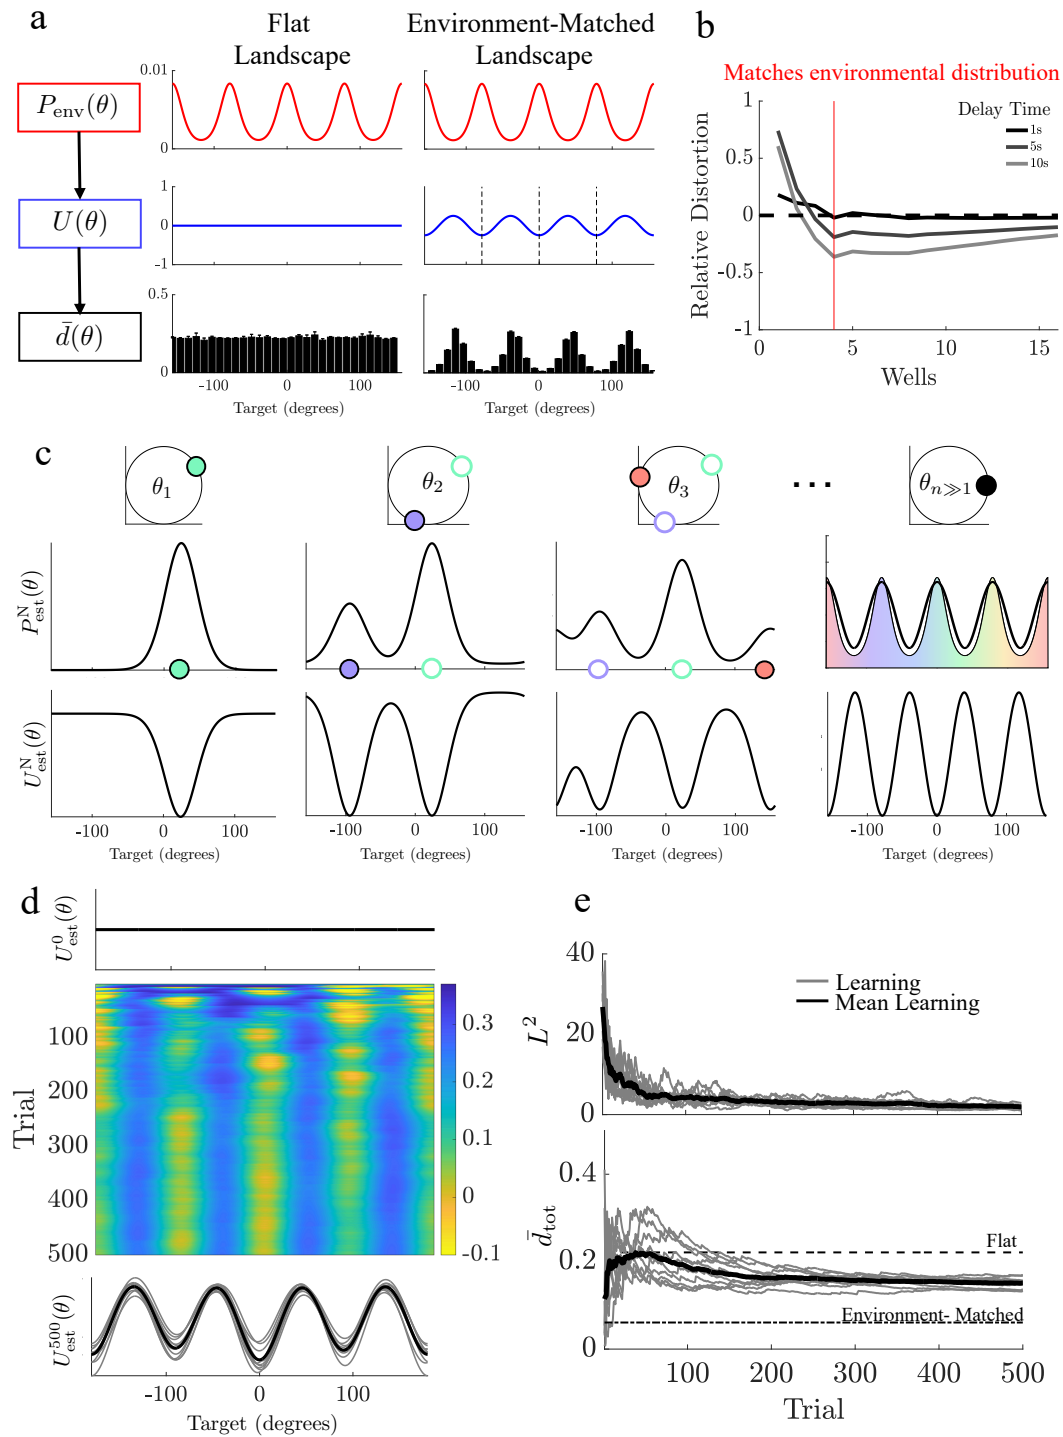

Figure 3: Distortion is reduced when energy landscapes match the environmental prior. **a**. Top: a heterogeneous environmental distribution ( $P_{\text{env}}(\theta)$ ) passes through a heterogeneous energy landscape ( $U(\theta)$ ) and alters the mean bootstrapped distortion ( $\bar{d}(\theta)$ ) at a given target value  $\theta$  ( $N_{\text{boot}} = 1e3$ ). **b**. Relative total mean distortion compared between the flat landscape and heterogeneous landscapes (negative values denote reduced distortion for heterogeneous landscape). Red vertical line denotes where the number (and position) of attractors are aligned to peaks in the environmental prior. **c** Schematic of learning in a particle model. Based on the target observed on each trial, the estimated environmental distribution  $P_{\text{est}}^N(\theta) = P(\theta|\theta_{1:N})$  and the particle landscape  $U_{\text{est}}^N(\theta)$  is updated at the target location. Over the course of many trials, the estimated distribution  $P_{\text{est}}^N(\theta)$  becomes more similar to the environmental prior  $P_{\text{env}}(\theta)$ , and the energy landscape aligns its wells to its peaks. **d** Heatmap showing the landscape updating over the course of many trials. Top trace shows initial landscape. Bottom trace displays the landscape on the final trial. Grey traces are 10 examples of the learning model, black trace is the average learning model's landscape. **e** Top:  $L^2$ -norm for the difference between the experience-dependent belief about the environmental distribution ( $P_{\text{est}}^N(\theta)$ ) and the true environmental distribution ( $P_{\text{env}}(\theta)$ ). Bottom: Running average of the learning model's total mean distortion ( $\bar{d}_{\text{tot}}$ ). Parameters for all sub-figures as listed in Methods Table 1.

## 133 Experience-dependent Learning in Particle Models

134 We next ask whether energy landscapes that model the effects of long-term plasticity can infer a prior based on a long  
135 sequence of observations. The effective learning rule assumes subjects sequentially infer the environmental prior from  
136 long-term experience: After each trial, the subject's running estimate of the environmental prior is merged with a like-  
137 lihood function peaked at the current trial's target value. This evolving estimate of the prior can be represented in the  
138 energy landscape by updating the landscape such that peaks in the prior estimate are encoded by attractors, correspond-  
139 ing to regions of synaptic potentiation in an equivalent neural circuit description (see Methods and Fig. **3c**). Over many  
140 trials, the energy landscape develops attractors aligned with the common feature locations (Fig. **3c,d**), regardless of ob-  
141 servation order (Fig. **S6**). Thus, the experience-dependent updates generate learning of the environmental prior, and the  
142 energy landscape reflects better estimates of the environmental structure, which reduces total mean distortion, trending  
143 towards the distortion of a particle model assigned an environment-matched energy landscape (Fig. **3e**).

## 144 Subjects' Behavior shows Hallmarks of Learning

145 We next validate our static and learning particle models against responses from a previously reported data set in which  
146 120 human subjects perform sequences of delayed-estimation trials for target colors drawn from distributions along a  
147 one-dimensional ring (see [16] for more details). Subjects were cued with two items, the target and distractor, and asked  
148 to respond with the color of one item after a short (0.5s) or long (4s) delay. Item colors on each trial were selected from  
149 either an (a) uniform stimulus distribution or (b) heterogeneous distribution with four peaks, offset randomly for each  
150 subject (Fig. **4a**).

151 We ask if subject responses are best described by particle models with energy landscapes from one of three classes:  
152 (a) fixed and uniform; (b) fixed and heterogeneous; or (c) evolving from each subject's stimulus history. Our fixed  
153 and heterogeneous class of models includes three variations: 1. a model with attractors spaced evenly around the ring  
154 aligned to each subject's assigned environmental offset (Static Heterogeneous), with free parameters for the amplitude,  
155 the number of attractors, and the noise amplitude; 2. a variation allowing the offset of the attractors to deviate from the  
156 peaks of the prior (Offset Heterogeneous model); and 3. a variation in which the energy landscape is determined by two  
157 Fourier modes (Dual Heterogeneous model) (Figs. **4b** and **S7**).

158 We also consider four learning models: one form (two models) updates the energy landscape based only on the target  
159 (Target Only), and another form (two models) updates the potential landscape based on both observed items (Target +  
160 Distractor)(Fig. **4c**). The initial prior (initial landscape) is also varied to account for subjects' potential systematic biases,  
161 since subjects can exhibit color biases even given uniform environmental priors [16]. Learning models are initialized  
162 either with a flat landscape (Flat Prior) or with a landscape with attractors at the locations of the subject population's  
163 biases identified in [16] (Heterogeneous Prior) (Fig. **S7**).

164 To identify the model that best matches each subject's responses, we apply cross-validation based on the mean  
165 squared error between subject and simulated responses (see Methods), across many possible parameter sets for each  
166 model. Nearly all subjects' responses (93% of subjects in short trials and 96% of subjects in long trials) are best described



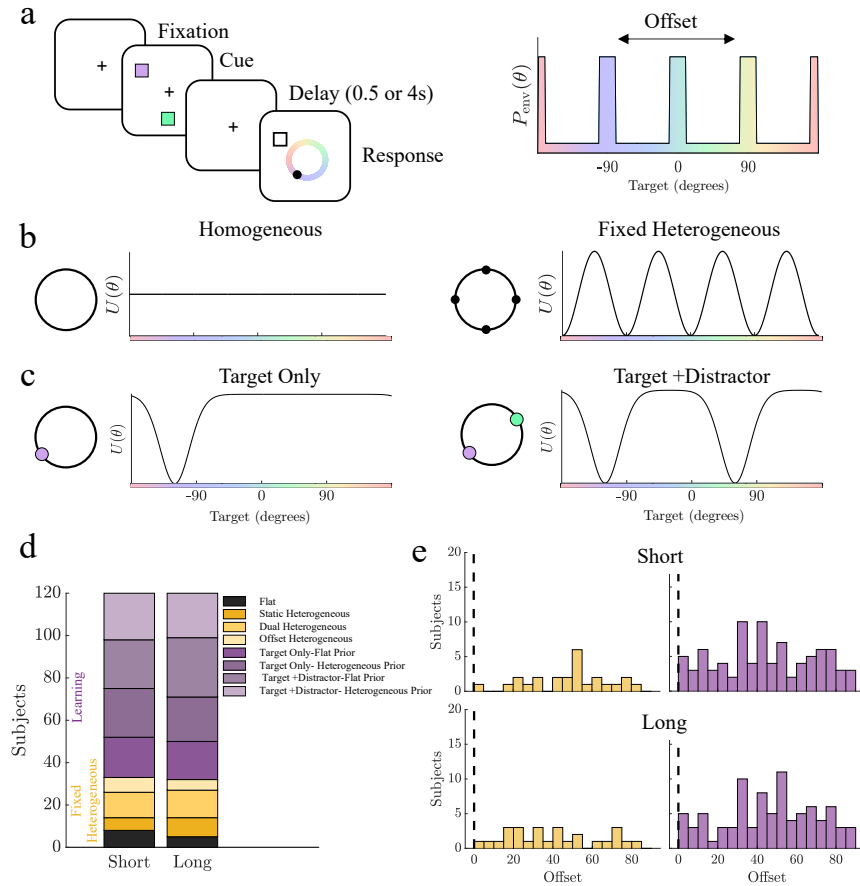

Figure 4: Subject responses based on targets drawn from heterogeneous distributions are best replicated by models governed by heterogeneous landscapes (static and learned). **a**. Experiment 2 from [16] in which subjects were shown two items, each of which could be drawn from a heterogeneous distribution whose peaks were evenly distributed but randomly offset for each subject. Subjects were prompted to respond with the corresponding color of one item. **b**. Fixed particle models used. Homogeneous landscape includes one free parameter, diffusion. Fixed Heterogeneous models include at least three free parameters: amplitude, number of wells, and diffusion. **c**. Learning particle models. Each model updates iteratively based on three parameters: width of the bump, depth of the bump, and diffusion. Target-Only learning models incorporate only the target prompted for response, and Target+ Distractor models incorporate both items. **d**. Number of subjects best matched to each model type for short and long delay periods. **e**. Assigned offsets for subjects best matched to Fixed Heterogeneous models (yellow) and Learning models (purple). Dashed lines shows human population bias location.

167 by heterogeneous models, with a majority of subjects applying learning models (72% of subjects in short trials and 73%  
 168 of subjects in long trials; Fig. 4d). We find that many subjects best matched to learning and fixed heterogeneous  
 169 models have assigned environmental prior offsets centered away from the population biases but not uniformly distributed  
 170 for both short and long trials ( $p < 0.05$ , two-sample Kolmogorov-Smirnov test) and that the distribution of assigned  
 171 offsets for learning model subjects is significantly different than that of subjects best fit to fixed heterogeneous models  
 172 ( $p < 0.05$ , two-sample Kolmogorov-Smirnov test), with more learning model subjects having an assigned offset that is  
 173 far from the population biases (Fig. 4e). This finding suggests that many subjects confronted with observations from an  
 174 environmental prior that differs from their baseline prior learn the new distribution of stimuli through experience.

## 175 Neural Mechanism for Learning Environmental Priors

176 We next identify a neural network model capable of implementing experience-dependent inference of environmental  
 177 priors, comparable to our particle models [22,38] (see Methods for a demonstration that this model can be asymptotically

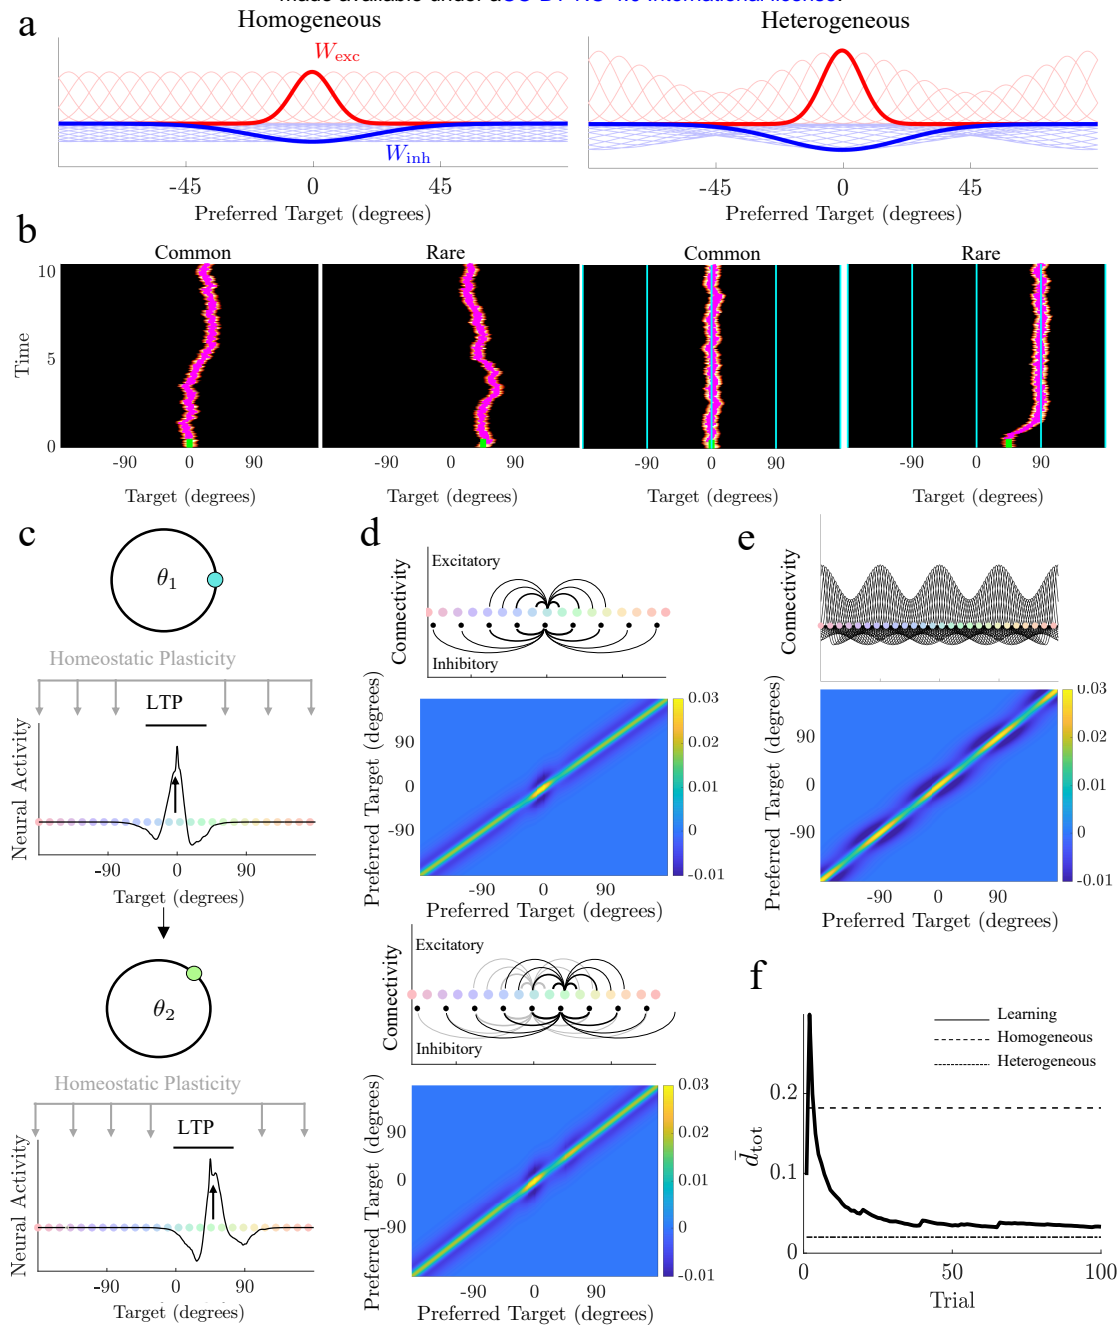

Figure 5: Experience-dependent modulation via long-term potentiation and homeostatic plasticity reduces distortion of encoded stimulus values. **a**. Localized excitatory ( $W_{exc}$ ) and inhibitory ( $W_{inh}$ ) synaptic weights associated with preferred item features in a neural field encoding a delayed estimate. Example of synaptic weight originating from neuron with preference  $\theta = 0$  shown in bold. Heterogeneous neural networks are modulated so synaptic footprints originating from peaks of  $P_{env}(\theta)$  are stronger. **b**. Example bumps of sustained neural activity over 10s delay period originating at common and rare targets in a homogeneous (left) and heterogeneous (right) case. Cyan traces in heterogeneous plots denote attractor locations with enhanced synaptic weights. Stimulus input duration shown in green. **c**. Experience-dependent learning results from long-term potentiation (LTP) of neurons with a preference for the previous target value and homeostatic reduction of connectivity elsewhere. **d**. Learning breaks the symmetry of the spatially-dependent weight kernel, creating enhanced peaks originating from neurons activated across trials. **e**. After many trials, the weight matrix recovers the static heterogeneous synaptic structure. **f**. Average total distortion over time decreases as the experience-dependent neural field model learns the environmental distribution. Parameters for all sub-figures as listed in Methods Table 3.

178 reduced to our particle models). In this neural field model, excitatory neurons are tuned to preferentially activate given  
 179 specific stimulus feature values. Average neural activity of neurons with a particular feature preference (location)  $x$  at  
 180 time  $t$  is described by the variable  $u(x, t)$  with synaptic connectivity (combining excitation and inhibition) described by

181 the function  $w(x, y)$ . Excitatory coupling is strongest between neurons with similar preferential tuning, and inhibitory-  
182 excitatory feedback shows corresponding broader connections (Fig. **5a**; left). Combined local excitation and lateral  
183 inhibition supports the formation of persistent neural activity bumps when a transient input is presented at a particular  
184 location [11,29,43]. When synaptic connectivity depends only on the difference between neurons' stimulus preferences,  
185 bumps have no intrinsically preferred positions in the network and lie along a continuous attractor, establishing an  
186 unbiased code for delayed estimation of an input stimulus value. Fluctuations that reflect synaptic noise cause bumps to  
187 wander freely with pure diffusion, so bumps are equally likely to move any direction (Fig. **5b**; left).

188 Spatially-varying heterogeneity (learned or prescribed) acting on the synaptic connectivity breaks the symmetry of  
189 the spatial synaptic footprint emanating from each neuron. When heterogeneity is strongest at the peaks of the envi-  
190 ronmental distribution, attractors are created (Fig. **5a**; right) that bias bumps to drift toward the most common stimulus  
191 locations (Fig. **5b**; right). This relationship between the increase in synaptic efficacy and the formation of attractors  
192 can be made mathematically precise via direct asymptotic analysis (see Methods). As such, there is a direct relation-  
193 ship between the stochastic dynamics of a bump's position and the particle models we have discussed already. In short,  
194 the introduction of synaptic heterogeneity effectively reshapes an energy landscape that determines the bump position.  
195 While this reduces bump wandering when encoding common stimulus values, bumps drift more when instantiated at  
196 rare targets, causing larger errors as they are drawn toward attractor locations. As with the particle models, total mean  
197 distortion of input stimulus values during the delay is reduced by spatial heterogeneity aligned to the environmental prior  
198 (Fig. **S8**).

199 We next identify a neuromechanistic learning rule that can modulate synaptic strength based on experience, reshaping  
200 the effective energy landscape along which the bump's position evolves: Synapses emanating from activated neurons  
201 (those encoding the stimulus value) are potentiated [22], while homeostatic plasticity compensates for this local increase  
202 in synaptic strength by reducing synaptic strength elsewhere throughout the network (Fig. **5c**). This rule comes from  
203 ample evidence for physiological mechanisms supporting long-timescale presynaptic potentiation throughout the ner-  
204 vous system [44, 45] and homeostatic mechanisms that can prevent runaway positive feedback loops of excitation and  
205 potentiation [46,47]. Such synaptic modulation leads to an increase in connectivity strength at the target location of each  
206 trial and a reduction of synaptic efficacy elsewhere (Fig. **5d**). Updates occur iteratively, so synaptic plasticity modulates  
207 weight functions across long timescales to reflect the environmental prior (Fig. **5e**). As with our particle models, once  
208 the neural network learns the environmental prior through experience, it maintains delayed estimates with reduced total  
209 mean distortion compared to homogeneous networks with fixed synaptic structure (Fig. **5f**).

## 210 Discussion

211 We have demonstrated that systematic biases observed in human subjects' delayed estimates can be attributed to envi-  
212 ronmental experience, specifically corresponding systematic variations in the frequency of stimulus feature values. Our  
213 work identifies a learning mechanism that can be implemented in reduced models and physiologically motivated neural  
214 circuit models and is validated by human response data. This moves beyond prior work which primarily proposed anal-

215 ogous attractor-based models with fixed energy landscapes [16, 29]. Our analysis lends credence to the claim that errors  
216 reflect a gradual inference of the environmental stimulus prior.

217 Beginning with a simplified model of delayed-estimate degradation, we confirm that systematic response biases can  
218 be induced by breaking the symmetry of the energy landscape that shapes the evolution of the delayed estimate over time.  
219 Such symmetry-breaking stabilizes memories at attractor locations that, when aligned to peaks in the environmental prior,  
220 reduce response error at common stimulus values at the expense of larger errors for rare feature values. Overall, total  
221 mean distortion of responses is reduced in models with aligned heterogeneous energy landscapes, compared to those  
222 with flat landscapes, given the higher propensity of common input stimulus values. Experience-dependent learning of  
223 the environment can be implemented neuromechanistically via long-term potentiation that enhances recurrent excitation  
224 in neurons encoding common stimulus values and homeostatic plasticity that regulates connectivity across the neural  
225 population. Responses from human subjects are better matched to models that learn environmental priors than those that  
226 do not, particularly if the task environment does not well match their baseline beliefs. Thus, subjects confronted with  
227 environments that deviate from their priors appear to dynamically update their beliefs based on experience, supporting  
228 our hypothesis that systematic biases are learned via experience-dependent plasticity.

229 Our work supports previous findings that response variability can be reduced in neuronal networks with spatial  
230 heterogeneity in synaptic connectivity, even if the stimulus probability is uniformly distributed across values [16, 28–  
231 30], and extends these findings to measure the efficiency of such codes when stimulus priors are non-uniform. While  
232 others have shown repulsive effects in persistent activity codes when implementing heterogeneous priors and computing  
233 efficient codes [6, 48], our models suggest synaptic heterogeneities should be aligned with peaks in the environmental  
234 prior to incorporate stronger connectivity at common stimulus values. These differences in results can be explained by  
235 applying two different underlying mechanisms to learning the environmental prior: “anti-Bayesian” biases can emerge  
236 from redistributing the frequency of neural tuning preferences such that more neurons have stimulus preferences near  
237 common feature values, and the stimulus estimate is biased away from common values due to the higher variance in the  
238 estimation of rare values [48]. In contrast, our work suggests that synaptic plasticity modifies connectivity to encode  
239 environmental priors. In humans, results on systematic working memory biases are mixed [21, 49–51], suggesting that  
240 subjects do not necessarily use consistent or optimized strategies. Our work supports this finding by identifying a number  
241 of different models that best match individual subject’s responses, many of which produce suboptimal results.

242 For example, subjects’ use of the distractor item as part of their updating procedure suggests that experience-  
243 dependent updates could occur during stimulus observation, rather than after subjects’ response as suggested by work on  
244 short-term serial biases [8, 22]. Representations of memoranda in multiple item working memory tasks have also been  
245 shown to interact, sometimes causing additional errors in memory [18, 52, 53] or reducing cardinal biases [54]. Notably,  
246 multi-items were presented sequentially in [54], implying that both short-term plasticity rules [22] and multi-item in-  
247 teractions, such as swapping errors [55], may work in conjunction to produce suboptimal strategies. Future work may  
248 consider how multi-item working memory tasks impact experience-dependent learning of task environments.

249 We had hypothesized that our fixed heterogeneous models would better represent subject responses when environ-

250 mental priors were more aligned to the population biases (offsets closer to the population bias peaks), because these  
251 environments would require less updating to subjects' environmental beliefs. In contrast, the population of subjects  
252 whose strategies are best described by fixed heterogeneous models have a wide range of assigned offsets, while most  
253 subjects described by learning models have assigned offsets that deviated from the original population biases. It is un-  
254 clear whether subjects matched to static models were resistant to learning or were not given sufficient experience (i.e.,  
255 trials) to adapt. Future studies could investigate the rate of learning when subjects are presented with stimuli drawn from  
256 heterogeneous environmental priors to identify the causes for subject-model variability.

257 Our work has established and validated a novel mechanistic hypothesis to describe how people infer the distribution  
258 of environmental stimuli and its impacts on their delayed estimates. Our results support recent findings on training-  
259 induced changes in prefrontal cortex [56], suggesting learning over longer timescales can have substantial stimulus-  
260 specific impacts in working memory. Moreover, our work posits that limitations and biases in working memory are not  
261 necessarily suboptimal, but can be motivated by efficient coding principles and modulated by environmental inference  
262 processes. These findings establish a correspondence between environmental inference and working memory that reveals  
263 a deeper understanding on the role of working memory in cognitive processes.

## 264 Materials and Methods

### 265 Particle Model

We described the models here in radian coordinates (i.e., the distance around the ring is  $2\pi$  rather than 360 degrees), but all figures were plotted by rescaling to degrees  $\text{deg} = (180/\pi) \cdot \text{rad}$ . All particle models with fixed energy landscapes used

$$U(\theta) = -A_p \cos(n\theta),$$

in which  $A_p$  described the amplitude and  $n$  described the number of wells (attractors). The homogeneous model was recovered when taking  $A_p = 0$ . Particle movement was simulated using a stochastic differential equation

$$d\theta(t) = -U'(\theta(t))dt + \sigma dW(t),$$

266 which incorporated noise as a Wiener process with increment  $dW(t)$ . Numerical simulations were performed using  
267 the Euler-Maruyama scheme in which the values for  $\theta$  were discretized to 1 degree ( $\pi/180$  radian) bins and time was  
268 discretized to 10ms bins. To recover the effects of drift alone  $-U'(\theta(t))dt$ , we set  $\sigma = 0$ . All parameter values listed in  
269 Table 1 were used unless otherwise stated.

| Variable           | Value |
|--------------------|-------|
| $\sigma$           | 0.05  |
| $A_p$              | 1     |
| $n$                | 4     |
| $T_{\text{Delay}}$ | 5     |
| $\beta$            | 8     |
| $h$                | 0.25  |
| $s$                | 5     |

Table 1: Parameter values for particle models.

## 270 Distortion

The mean distortion for a given input stimulus value was computed as

$$\bar{d}(\theta_{\text{env}}) = \int_{-\pi}^{\pi} P(\theta_{\text{resp}}|\theta_{\text{env}})(1 - \cos(\theta_{\text{resp}} - \theta_{\text{env}}))d\theta_{\text{resp}},$$

271 using Monte Carlo sampling. To compute stimulus-specific distortion for a given particle model and environment,  $\theta$  was  
 272 binned and simulations were used to compute  $\bar{d}(\theta_{\text{env}})$  for the bin ( $N_{\text{sim}} = 10^5$  per bin). Bootstrapping procedures were  
 273 used to resample distortion and compute the standard deviations ( $N_{\text{boot}} = 1e3$ ). To compute the effects of distortion  
 274 purely based on diffusion for heterogeneous models, simulations were sampled at a single attractor/common stimulus  
 275 value ( $\theta = 0$ ), while drift-only dynamics were simulated with  $\sigma = 0$ .

Total mean distortion across all stimulus values in an environmental prior was computed

$$\bar{d}_{\text{tot}} = \int_{-\pi}^{\pi} \int_{-\pi}^{\pi} P(\theta_{\text{env}})P(\theta_{\text{resp}}|\theta_{\text{env}})(1 - \cos(\theta_{\text{resp}} - \theta_{\text{env}}))d\theta_{\text{env}}d\theta_{\text{resp}},$$

276 which can be approximated by Monte Carlo simulations with initial conditions sampled from the environmental distri-  
 277 bution  $P_{\text{env}}$  ( $N_{\text{sim}} = 10^5$ ).

## 278 Conditional and Marginal Distributions

279 The conditional probability  $P(\theta_{\text{resp}}|\theta_{\text{env}})$  was computed by simulating the distribution of responses (particle end loca-  
 280 tions) for each discretized  $\theta_{\text{env}}$  value ( $N_{\text{sim}} = 10^5$ ). Marginal distributions of the response  $P(\theta_{\text{resp}})$  were computed by  
 281 averaging the discrete conditional probability solutions relative to the known environmental distribution  $P(\theta_{\text{env}})$ .

## 282 Relating the energy landscape to an experience-based posterior

An experience-based posterior can be related to the stationary distribution of a particle on an energy landscape associated with Eq. (2). The equivalent Fokker-Planck equation describing the evolution of the distribution  $p(\theta, t)$  of possible particle positions  $\theta$  at time  $t$  assuming a potential function  $U(\theta)$  was

$$\partial_t p(\theta, t) = \partial_{\theta} [U'(\theta)p(\theta, t)] + \frac{\sigma^2}{2} \partial_{\theta}^2 p(\theta, t). \quad (3)$$

We derived the form of  $U(\theta)$  that led to a stationary density that corresponds to a particular posterior  $L(\theta)$  in the limit  $t \rightarrow \infty$  in Eq. (3). The stationary density  $\bar{p}(\theta)$  was analogous to a posterior  $L(\theta)$  since it is the probability density that the system represents when there is no information about the current trial's target remaining. Thus, we derived an association between  $\bar{p}(\theta)$  and  $U(\theta)$  to identify how the energy landscape function  $U(\theta)$  should be tuned so that  $\bar{p}(\theta) \approx L(\theta)$ . In the limit  $t \rightarrow \infty$ , we found Eq. (3) becomes

$$\partial_{\theta}^2 \bar{p}(\theta) = -\frac{2}{\sigma^2} \partial_{\theta} [U'(\theta) \bar{p}(\theta)], \quad (4)$$

a second order ordinary differential equation with solution

$$\bar{p}(\theta) = \chi \exp \left[ -\frac{2U(\theta)}{\sigma^2} \right], \quad (5)$$

where  $\chi$  is a normalization factor. Thus, to match  $\bar{p} \approx L$ , we need

$$U(\theta) \approx \frac{\sigma^2}{2} \log \frac{\chi}{L(\theta)}.$$

We assumed that we were in the limit of weak heterogeneities, so the deviation of the function  $L(\theta)$  from flat will be weak, and  $L(\theta) \approx \frac{1}{2\pi} + \epsilon l(\theta)$  (where  $\int_{-\pi}^{\pi} l(\theta) d\theta = 0$ ), which allowed us to make a linear approximation

$$U(\theta) \approx \frac{\sigma^2}{2} [\log 2\pi\chi - 2\pi l(\theta)] \propto -l(\theta),$$

283 Thus, we removed the constant shift and were only concerned about the proportionality of the energy landscape to the  
284 negative of the variation  $l(\theta)$  in the posterior.

## 285 Experience-dependent particle model

To incorporate learning into the particle model, we updated its energy landscape based on the history of experienced stimulus values according to the equation

$$U_{est}^N(\theta) = \frac{N-1}{N} U_{est}^{N-1}(\theta) + \mathcal{N}_U \frac{h - s e^{\beta \cos(\theta - \theta_N)}}{N} \quad (6)$$

286 which incorporated a von Mises distribution centered at the location of the true stimulus value  $\theta_N$  on trial  $N$  with  $s$  as  
287 the scaling factor,  $h$  the shift, and  $\beta$  the spread. This energy landscape update was meant to represent the trial-by-trial  
288 probabilistic update to the stimulus distribution estimate. The mean distortion and the particle landscape were updated  
289 iteratively on each trial, such that for each stimulus, the distortion was computed and included in the running average.  
290 All parameter values listed in Table 1 were used unless otherwise stated.

The additive update of the particle landscape linearly approximated the typical multiplicative scaling of posterior updating based on successive independent observations. To demonstrate how the updating rule for the energy landscape

is related to Bayesian sequential updating of the posterior, recall that that enforcing  $U(\theta) \propto -l(\theta)$  ensured an energy landscape aligned with the learned posterior. Thus, we derived an approximate inferred distribution of possible future stimulus target values, updated based on the observed history  $\theta_{1:N}$ . We assumed that when an observer sees a target value  $\theta_N$ , they inferred that subsequently similar values are more likely, according to the von Mises distribution

$$f_{\theta_N}(\theta) = \mathcal{N} e^{\beta \cos(\theta - \theta_N)},$$

where  $\mathcal{N}$  was a normalization factor. We noted this was self-conjugate ( $f_{\theta'}(\theta) \equiv f_{\theta}(\theta')$ ). We will also assumed that  $0 < \beta \ll 1$ , so the variation in  $f_{\theta'}(\theta)$  was weak, which allowed us to approximate  $f_{\theta_N}(\theta) \approx \mathcal{N} [1 + \beta \cos(\theta - \theta_N)]$ . Sequential analysis then could determine how a posterior for future observations should be updated based on each observed target. Take  $p_N(\theta) = p(\theta|\theta_{1:N})$  to be the posterior based on past observations  $\theta_{1:N}$  which can be computed directly as the product of probabilities

$$p_N(\theta) = \frac{\bar{p}}{p(\theta_{1:N})} \prod_{j=1}^N f_{\theta_j}(\theta),$$

where  $\bar{p}$  is the uniform distribution and we have utilized the self-conjugacy of  $f_{\theta'}(\theta) \equiv f_{\theta}(\theta')$ . We used the linearization of the likelihood function and truncated to linear order in  $\beta$  to find

$$p_N(\theta) \approx \frac{1}{2\pi} \left[ 1 + \beta \sum_{j=1}^N \cos(\theta - \theta_j) \right],$$

which, with the approximate formula for  $f_{\theta_N}(\theta)$ , can be written as

$$p_N(\theta) \approx \frac{N-1}{N} p_{N-1}(\theta) + \frac{1}{N} f_{\theta_N}(\theta).$$

Lastly, noting the proportional relationship of the desired energy landscape to the posterior,  $U_N(\theta) \propto -l_N(\theta)$ , we found that the appropriate update for the energy landscape to match this iterative additive update of the posterior was

$$U_N(\theta) \propto \frac{N-1}{N} U_{N-1}(\theta) - \frac{1}{N} f_{\theta_N}(\theta),$$

291 which we could rewrite using the full form of  $f_{\theta_N}(\theta)$  plus a shift to obtain Eq. (6).

Thus, in the long-term limit (as  $N \rightarrow \infty$ ), the energy landscape convolved the environmental prior  $P_{\text{env}}(\theta)$  against the negative of the likelihood function:

$$U_{\infty}(\theta) \propto - \int_{-\pi}^{\pi} P_{\text{env}}(\theta - \theta') \exp [\beta \cos \theta'] d\theta'.$$

Given that the environmental prior had the form  $P_{\text{env}}(\theta) = \mathcal{N} e^{A \cos(m\theta)}$ , we then made the approximation  $P_{\text{env}}(\theta - \theta') \approx$



$\frac{1}{2\pi} + A \cos(m(\theta - \theta')) = \frac{1}{2\pi} + A \cos(m\theta) \cos(m\theta') + A \sin(m\theta) \sin(m\theta')$ , so we could compute

$$U_\infty(\theta) \propto -\mathcal{A} \cos(m\theta),$$

292 where  $\mathcal{A} = A \int_{-\pi}^{\pi} \cos(m\theta') \exp[\beta \cos \theta'] d\theta'$  and the other term vanished due to its odd symmetry. This was consistent  
293 with the form of the fixed heterogeneity we used to align with this environmental prior.

## 294 Human data

295 Response data from a delayed estimation task was taken from [16], experiment 2, with permission. The task was admin-  
296 istered to 120 consenting subjects with normal color vision in Amazon Mechanical Turk who performed and achieved  
297 minimal engagement. Each trial within the task presented a subject with two colored squares simultaneously for 200ms  
298 after which time they disappeared and a delay of 500 ms (100 short trials) or 4000 ms (100 long trials) ensued prior to a  
299 response being cued by presenting an outlined square in the location of one of the two previous prompt (implicit identi-  
300 fication of the target object). Participants then provided an estimate of the cued color by using a mouse to drag a small  
301 circle around a ring of colored continuum. Each item had a 50% chance of being drawn from the biased distribution.  
302 The biased distribution included 4 peaks spanning 20 degrees, equally spaced about the circle. The offset of the stimulus  
303 peaks were picked uniformly and randomly and assigned independently to each subject. The location of the population  
304 bias was identified based on the peaks in response frequency across the population of human subjects observed in ex-  
305 periment 1 from [16], which probed subjects to report a color drawn from a uniform distribution but subject showed  
306 preferences in the reports.

## 307 Subject model fitting

We fit subject responses to 8 different particle models and identified the most likely model using cross-validation:

1. **Flat potential** (1 free parameter) in which the particle dynamics were only influenced by diffusion

$$d\theta(t) = \sigma dW(t).$$

2. **Static Heterogeneous** (3 free parameters) in which the particle was subject to drift and diffusion, parameterized by  
the  $A_p$  (amplitude),  $n$  (number of wells), and noise  $\sigma$ ,

$$d\theta(t) = -A_p \sin(n\theta - \theta_{\text{off}}) dt + \sigma dW(t),$$

308 where  $\theta_{\text{off}}$  was the offset assigned to a subject by the experiment (not fit).

309 3. **Offset Heterogeneous** (4 free parameters) included all of the above parameters but incorporated a free parameter  
310 for the offset value  $\theta_{\text{off}}^s$ , such that a subject could use a model not aligned to their assigned offset  $\theta_{\text{off}}$ .

4. **Dual Heterogeneous** (5 free parameters) assumed that subject response were governed by an energy landscape

determined by two frequencies ( $n_1$  and  $n_2$ ) with amplitudes  $A_1$  and  $A_2$ , and assuming the offset to be at the assigned location. The stochastic dynamics of the particle were described

$$d\theta(t) = -A_1 \sin(n_1\theta - \theta_{\text{off}})dt - A_2 \sin(n_2\theta - \theta_{\text{off}})dt + \sigma dW(t).$$

311 **5-6. Target-only Learning** (3 free parameters) assumed the energy landscape was updated on each trial as described  
 312 in the experience-dependent particle model section above, by adding an inverted von Mises distribution centered at the  
 313 target location with free parameters for  $\beta$  and  $s$ . Noise was parameterized by  $\sigma$  as before. The initial landscape was  
 314 either chosen to be (a) flat  $U_0(\theta) = 0$ , or (b) heterogeneous  $U_0(\theta) = -A_p \cos(4(\theta - \theta_{\text{off}}))$  with  $A_p = 1$  and  $\theta_{\text{off}}$  aligned  
 315 to the offset of the established population biases described above.

316 **7-8. Target + Distractor Learning** (3 parameters) models were implemented equivalently to the ‘‘Target-only’’  
 317 model but were updated by adding two inverted von Mises distributions to the energy landscape on each trial, one  
 318 centered at the target and the other centered at the distractor stimulus value.

319 Models were fit to each subject’s set of responses using 5-fold cross-validation performed for short and long delay  
 320 trials separately. For each subject-model, we tested 100 parameter sets, selected uniformly from a bounded domain for  
 321 each parameter (Table 2), on 80% of the trials, running 100 simulations with each set of parameters for each trial. The  
 322 mean squared error (MSE) between each simulated and subject response were computed, and the parameter set with the  
 323 lowest MSE was selected for that subject-model pair. We then simulated responses for the final 20% of trials using the  
 324 selected parameter set and computed the MSE for these trials. This process was performed 5 times, testing all trials. The  
 325 testing-set MSEs were then averaged, and the model with lowest mean testing-set MSE was selected for each subject.

## 326 Neural Field Model

We used a lateral inhibitory neural field model on the ring [29, 43, 57], in which the locations of neurons corresponded to their preferred stimulus value

$$du(x, t) = [-u(x, t) + \int_{-\pi}^{\pi} (1 + h(y))w(x - y)f(u(y, t))dy]dt + \epsilon u(x, t)dW(x, t) + I(x, t)dt, \quad (7)$$

| Model Class        | Variable                | Bounded Domain |
|--------------------|-------------------------|----------------|
| Flat, Fixed, Learn | $\sigma$                | 0.01 – 0.2     |
| Fixed              | $A_p/A_1/A_2$           | 0.1 – 2        |
| Fixed              | $n/n_1/n_2$             | 1 – 12         |
| Fixed              | $\theta_{\text{off}}^s$ | $0 - \pi/2$    |
| Learn              | $\beta$                 | 1-10           |
| Learn              | $s$                     | 1-10           |

Table 2: Parameter ranges for human response model fitting.

where  $u(x, t)$  was the mean activity at the location  $x \in [-\pi, \pi]$ . Spatial connectivity was described by

$$w(x - y) = \exp[-(x - y)^2] - A_{\text{inh}} \exp\left[-\frac{(x - y)^2}{\sigma_{\text{inh}}^2}\right],$$

327 combining both local excitation and broad inhibition, where  $A_{\text{inh}}$  was the strength of inhibition and  $\sigma_{\text{inh}}^2$  described the  
 328 inhibitory spread. Heterogeneity in connectivity was described by the function  $h(y)$ , which could be learned or fixed.  
 329 Fixed periodic heterogeneity was incorporated by taking  $h(y) = A_n \cdot \cos(ny)$ , where we bounded  $A_n \in (-1, 1)$  to  
 330 preserve excitatory/inhibitory polarity.

The firing rate nonlinearity  $f(u(y, t))$  was taken to be a Heaviside function

$$H(u - \kappa) = \begin{cases} 1, & u \geq \kappa, \\ 0, & u < \kappa, \end{cases}$$

331 in which  $\kappa$  described the firing rate threshold.

Noise  $\epsilon u(x, t)dW(x, t)$  was weak, multiplicative, and driven by a spatially-dependent, white-in-time, Wiener process with the spatial filter that decayed with distance  $|x - y|$ :

$$F(x - y) = \sqrt{\epsilon} \exp(-|x - y|) \sqrt{(dx)},$$

332 and  $\epsilon$  described the noise strength.

Input to the network corresponding to the true location of the stimulus target at location  $x_{\text{targ}}$  was given by

$$I(x, t) = I_0(1 - H(t - t_{\text{inp}})) \exp\left[-\frac{(x - x_{\text{targ}})^2}{2\sigma_{\text{inp}}^2}\right],$$

333 where  $I_0$  was the strength of the input and  $\sigma_{\text{inp}}^2$  parameterized the width of the input. Note, the location  $x_{\text{targ}}$  was sampled  
 334 from the environmental distribution  $P(x_{\text{env}})$  as described above to comprise a long sequence  $x_{1:N}$  across trials.

335 Neural activity evolved by applying Euler-Maruyama iterations to the timestep  $dt$  and Riemann integration with  $dx$   
 336 to the integral in the discretized version of Eq. (7). The bump's centroid was then identified as the peak in neural activity  
 337 at each time  $\theta_{\text{cent}}(t) = \operatorname{argmax}_{x \in [-\pi, \pi]} u(x, t)$ . All model parameters are given in Table 3 and were selected to ensure  
 338 bumps would not extinguish prior to the end of the delay period. Responses for each trial were reported as the location  
 339 of centroid at the end of the delay period  $\theta_{\text{cent}}(T)$ .

#### 340 Linking the neural field and particle models

341 The dynamics of bump solutions to Eq. (7) can be reduced to first order to describe how their position  $\tilde{\theta}(t)$  evolved over  
 342 time, roughly approximating the centroid (peak location of neural activity). A reduced stochastic differential equation  
 343 can be derived describing how this position evolves in time due to noise, inputs, and heterogeneity in the weight function.  
 344 Technical details for such calculation can be found in [22,38]. Here we give a brief sketch of such analysis, to demonstrate

| Variable              | Value |
|-----------------------|-------|
| $A_{\text{inh}}$      | 0.35  |
| $\sigma_{\text{inh}}$ | 3     |
| $A_n$                 | 0.4   |
| $n$                   | 4     |
| $\kappa$              | 0.1   |
| $\epsilon$            | 0.5   |
| $I_0$                 | 1     |
| $t_{\text{inp}}$      | 0.5   |
| $\sigma_{\text{inp}}$ | 1     |
| $T_{\text{delay}}$    | 10    |
| $A_{\text{inp}}$      | 1     |
| $s_{\text{learn}}$    | 0.1   |
| $dt$                  | 0.1   |
| $dx$                  | 0.036 |

Table 3: Neural Field Parameter Values.

345 the tight mathematical link between our particle models and the stochastic dynamics of bump solutions to our neural field  
346 equations.

Ignoring noise ( $\epsilon \rightarrow 0$ ), heterogeneity ( $h(y) \rightarrow 0$ ), and input  $I \rightarrow 0$ , Eq. (7) had bump solutions  $\mathcal{U}(x)$  that satisfied the equation  $\mathcal{U}(x) = \int_{-\pi}^{\pi} w(x-y)f(\mathcal{U}(y))dy$  [38]. This bump was marginally stable and lay on a continuous attractor, so it could be placed at any position  $[-\pi, \pi]$  [43]. Without loss of generality, we assumed this position was initially  $x = 0$ , we could track dynamics of the bump's position  $\tilde{\theta}(t)$  once noise, heterogeneity, and input were reintroduced by deriving a hierarchy of equations for the expansion  $u = \mathcal{U}(x - \tilde{\theta}) + \epsilon\Phi(x - \tilde{\theta}, t) + \epsilon^2\Phi_1(x - \tilde{\theta}, t) + \dots$ . Enforcing solvability of this hierarchy introduced a condition requiring the sum of the noise, input, and heterogeneity to be orthogonal to the nullspace  $\varphi(x)$  of the adjoint of the operator that comes from linearizing Eq. (7) about the bump solution. The result was a drift-diffusion equation whose drift was determined by the energy landscape invoked by both the synaptic weight heterogeneity and input

$$d\tilde{\theta} = -U'(\tilde{\theta})dt + d\mathcal{W}(t),$$

precisely the form of Eq. (2), where the drift had contributions from the weight heterogeneity and input

$$U'(\tilde{\theta}) = \underbrace{\frac{\int_{-\pi}^{\pi} \varphi(x) \int_{-\pi}^{\pi} w(x-y)h(y+\tilde{\theta})f(\mathcal{U}(y))dydx}{\int_{-\pi}^{\pi} \varphi(x)\mathcal{U}'(x)dx}}_{\text{heterogeneity}} + \underbrace{\frac{\int_{-\pi}^{\pi} \varphi(x)I(x+\tilde{\theta}, t)dx}{\int_{-\pi}^{\pi} \varphi(x)\mathcal{U}'(x)dx}}_{\text{input}} \quad (8)$$

and the Wiener process noise  $\mathcal{W}(t)$  had zero mean and variance

$$\langle \mathcal{W}(t)^2 \rangle = \epsilon^2 \frac{\int_{-\pi}^{\pi} \int_{-\pi}^{\pi} \varphi(x)\mathcal{U}(x)\varphi(y)\mathcal{U}(y)C(x-y)dx dy}{\left[ \int_{-\pi}^{\pi} \varphi(x)\mathcal{U}'(x)dx \right]^2}. \quad (9)$$

The heterogeneity and input introduced an energy landscape that steers the position  $\tilde{\theta}(t)$  of the bump as it responds to noise fluctuations. As shown in [22, 38], by dropping the input term and considering a Heaviside nonlinearity  $f(u) =$

$H(u - \kappa)$ ,  $f(\mathcal{U}(x)) = H(x + a) - H(x - a)$  and  $\varphi(x) = \delta(x - a) - \delta(x + a)$  where  $a$  was the half-width of the bump such that  $\mathcal{U}(x) > \kappa$  for  $x \in [-a, a]$  and  $\mathcal{U}(x) < \kappa$  otherwise and  $\delta$  was a Dirac delta function. As such, we could simplify the energy landscape gradient formula to find

$$U'(\tilde{\theta}) = \alpha \int_{-a}^a [w(y - a) - w(a + y)]h(y + \tilde{\theta})dy.$$

*Approximation with Fourier modes.* Note that by decomposing the even weight function into its Fourier series, we have

$$w(x - y) = \sum_{k=0}^{\infty} w_k \cos(k(x - y)),$$

which allowed us to write

$$w(a - y) - w(a + y) = 2 \sum_{k=1}^{\infty} w_k \sin(ka) \sin(ky).$$

In a similar way, we could decompose the function describing the heterogeneity in the weight

$$h(y) = \sum_{k=0}^{\infty} a_k \sin(ky) + b_k \cos(ky).$$

Approximating by the dominant Fourier mode (assume it is even,  $m = \operatorname{argmax}_k b_k$ ), we took  $h(y) \approx b_m \cos(my)$ . Integrating against the difference of the shifted homogeneous weight function, then we found  $U'(\tilde{\theta}) \approx 2\alpha_m \sin(m\tilde{\theta})$  and thus  $U(\tilde{\theta}) \approx -\frac{2\alpha_m}{m} \cos(m\tilde{\theta})$ , where

$$\alpha_m = \frac{\alpha w_m}{2m} \sin(ma) (\sin(2 * ma) - 2ma) + \sum_{k \neq m} \frac{2b_m w_k}{m^2 - k^2} \sin(ka) [m \cos(ma) \sin(ka) - k \sin(ma) \cos(ka)].$$

347 Note also that as  $m$  and  $k$  differ more, the coefficient in the sum will decrease, suggesting the dominant terms from the  
 348 series description of  $w$  will be those for the modes  $k$  indexed close to  $m$ . Thus, a scaling of the dominant Fourier mode  
 349 of the weight heterogeneity well approximated the energy landscape associated with the bump's stochastic motion.

350 *Narrow bump approximation.* Assuming the bump width was narrow compared to the length scale of the heterogeneity, we could estimate the integral using the trapezoidal rule

$$U'(\tilde{\theta}) = \alpha a \left[ (w(2a) - w(0))h(-a + \tilde{\theta}) + (w(0) - w(2a))h(a + \tilde{\theta}) \right],$$

so by expanding the even weight function  $w(2a) \approx w(0) + 2a^2 w''(0)$  as well as linearizing the heterogeneity  $h(\pm a + \tilde{\theta}) \approx h(\tilde{\theta}) \pm ah'(\tilde{\theta})$ , we obtained

$$U'(\tilde{\theta}) \approx -4\alpha a^3 w''(0)h'(\tilde{\theta}),$$

and thus

$$U(\tilde{\theta}) \approx -4\alpha a^3 w''(0) h(\tilde{\theta}),$$

351 so the energy landscape generated for the bump position from weight heterogeneity  $h(y)$  was approximately proportional  
 352 to the negative shape of the heterogeneity. As such, any neurons whose emanating synapses were potentiated/depressed  
 353 then attract/repulse the bump.

#### 354 Plasticity rules in neural field model

To include experience-dependent learning into our neural field model, we allowed the function that modulated the synapses emanating from each neuron to evolve  $(1 + s(y, t))$ , updating with each trial  $N$  based on presynaptic neural activation  $(u(x, T_{inp}; N - 1))$  while the network received input (i.e., at the stimulus location in trial  $N - 1$ ,  $x_{N-1}$ ),

$$s(y, T_{inp}; N) = s(y, T_{inp}; N - 1) + \beta_s \cdot u(x, T_{inp}; N - 1)$$

where  $\beta_s$  was a scaling factor for long-term plasticity. Such a rule implemented an activity-dependent form of presynaptic potentiation, deemed transmitter-induced long-term plasticity by [46] and for which multiple mechanisms have been proposed [47, 58, 59]. Equivalently, this is a slow form of short-term synaptic facilitation, emerging in neural field models the same way we have included it here [22, 37]. Inclusion of homeostatic mechanisms was based on ample evidence showing it capable of preventing runaway potentiation [46, 60]. In particular, we considered a mechanism that provides a saturation threshold setting an upper limit on potentiation [61]. Since potentiation would otherwise drive network strength above this threshold, mathematically this amounted to always normalizing peak synaptic strength via the computation

$$s(y, T_{inp}; N) = 2 * (s(y, T_{inp}; N) - \min(s(y, T_{inp}; N)) / (\max(s(y, T_{inp}; N) - \min(s(y, T_{inp}; N)) - 1).$$

As in the case of the energy landscape, we could determine the long-term limiting heterogeneity  $s_\infty(y)$  resulting from the learning rule combined with an environmental prior  $P_{env}(\theta)$ . Approximating the shape of the instantiated bump by a von Mises distribution centered at the location of the stimulus value on each trial and assuming weak modifications to the heterogeneity, the long time limit gave

$$s_\infty(y) \approx \beta_s \int_{-\pi}^{\pi} P_{env}(y - y') \exp[\beta_u \cos y'] dy',$$

and, by making the approximation  $P_{env}(y - y') \approx \frac{1}{2\pi} + A \cos(my) \cos(my') + A \sin(my) \sin(my')$ , then

$$s_\infty(y) \approx \tilde{\beta} \cos(my),$$

355 consistent with the expected form of synaptic heterogeneity and resulting energy landscape.

## 356 Acknowledgements

357 **Funding:** We thank Matthew Panichello and Krešimir Josić for their valuable feedback on the manuscript. We thank  
358 Matthew Panichello and Timothy Buschman for supplying the previously published human data analyzed here. This  
359 work is funded by National Institutes of Health grant 1R01EB029847-01.

360

### 361 **Author Contributions:**

362 Conceptualization: TLE, ZPK

363 Methodology: TLE, ZPK

364 Investigation: TLE

365 Visualization: TLE

366 Supervision: ZPK

367 Writing-original draft: TLE

368 Writing-review and editing: TLE, ZPK

369

370 **Competing Interests:** The authors declare that they have no competing interests.

371

372 **Data and Materials Availability:** The data used to generate the figures and code developed for all proposed models has  
373 been made available on [github.com/teissa/HeterogeneousWorkingMemory](https://github.com/teissa/HeterogeneousWorkingMemory).

374

## 375 References

376 [1] Postle, B. R. Working memory as an emergent property of the mind and brain. *Neuroscience* **139**, 23–38 (2006).

377 [2] Ma, W. J., Husain, M. & Bays, P. M. Changing concepts of working memory. *Nature neuroscience* **17**, 347–356  
378 (2014).

379 [3] Luck, S. J. & Vogel, E. K. Visual working memory capacity: from psychophysics and neurobiology to individual  
380 differences. *Trends in cognitive sciences* **17**, 391–400 (2013).

381 [4] Fougnie, D., Suchow, J. W. & Alvarez, G. A. Variability in the quality of visual working memory. *Nature commu-*  
382 *nications* **3**, 1–8 (2012).

383 [5] Bays, P. M. Noise in neural populations accounts for errors in working memory. *Journal of Neuroscience* **34**,  
384 3632–3645 (2014).

- 385 [6] Taylor, R. & Bays, P. M. Efficient coding in visual working memory accounts for stimulus-specific variations in  
386 recall. *Journal of Neuroscience* **38**, 7132–7142 (2018).
- 387 [7] Bliss, D. P., Sun, J. J. & D’Esposito, M. Serial dependence is absent at the time of perception but increases in visual  
388 working memory. *Scientific reports* **7**, 1–13 (2017).
- 389 [8] Barbosa, J. *et al.* Interplay between persistent activity and activity-silent dynamics in the prefrontal cortex underlies  
390 serial biases in working memory. *Nature neuroscience* **23**, 1016–1024 (2020).
- 391 [9] Ploner, C. J., Gaymard, B., Rivaud, S., Agid, Y. & Pierrot-Deseilligny, C. Temporal limits of spatial working  
392 memory in humans. *European Journal of Neuroscience* **10**, 794–797 (1998).
- 393 [10] Schneegans, S. & Bays, P. M. Drift in neural population activity causes working memory to deteriorate over time.  
394 *Journal of Neuroscience* **38**, 4859–4869 (2018).
- 395 [11] Compte, A., Brunel, N., Goldman-Rakic, P. S. & Wang, X.-J. Synaptic mechanisms and network dynamics under-  
396 lying spatial working memory in a cortical network model. *Cerebral cortex* **10**, 910–923 (2000).
- 397 [12] Goldman-Rakic, P. S. Cellular basis of working memory. *Neuron* **14**, 477–485 (1995).
- 398 [13] Wang, X.-J. Synaptic reverberation underlying mnemonic persistent activity. *Trends in neurosciences* **24**, 455–463  
399 (2001).
- 400 [14] Wimmer, K., Nykamp, D. Q., Constantinidis, C. & Compte, A. Bump attractor dynamics in prefrontal cortex  
401 explains behavioral precision in spatial working memory. *Nature neuroscience* **17**, 431–439 (2014).
- 402 [15] Constantinidis, C. & Klingberg, T. The neuroscience of working memory capacity and training. *Nature Reviews.*  
403 *Neuroscience* **17**, 438–449 (2016).
- 404 [16] Panichello, M. F., DePasquale, B., Pillow, J. W. & Buschman, T. J. Error-correcting dynamics in visual working  
405 memory. *Nature communications* **10**, 1–11 (2019).
- 406 [17] Papadimitriou, C., Ferdoash, A. & Snyder, L. H. Ghosts in the machine: memory interference from the previous  
407 trial. *Journal of neurophysiology* **113**, 567–577 (2015).
- 408 [18] Almeida, R., Barbosa, J. & Compte, A. Neural circuit basis of visuo-spatial working memory precision: a compu-  
409 tational and behavioral study. *Journal of neurophysiology* **114**, 1806–1818 (2015).
- 410 [19] Bae, G.-Y., Olkkonen, M., Allred, S. R. & Flombaum, J. I. Why some colors appear more memorable than others:  
411 A model combining categories and particulars in color working memory. *Journal of Experimental Psychology:*  
412 *General* **144**, 744–763 (2015).
- 413 [20] Scocchia, L., Cicchini, G. M. & Triesch, J. What’s “up”? Working memory contents can bias orientation processing.  
414 *Vision Research* **78**, 46–55 (2013).



- 415 [21] Girshick, A. R., Landy, M. S. & Simoncelli, E. P. Cardinal rules: visual orientation perception reflects knowledge  
416 of environmental statistics. *Nature Neuroscience* **14**, 926–932 (2011).
- 417 [22] Kilpatrick, Z. P. Synaptic mechanisms of interference in working memory. *Scientific Reports* **8**, 7879 (2018).
- 418 [23] Barbosa, J. *et al.* Interplay between persistent activity and activity-silent dynamics in prefrontal cortex underlies  
419 serial biases in working memory. *Nature neuroscience* **23**, 1016–1024 (2020).
- 420 [24] Klingberg, T. Training and plasticity of working memory. *Trends in cognitive sciences* **14**, 317–324 (2010).
- 421 [25] Laughlin, S. A simple coding procedure enhances a neuron’s information capacity. *Zeitschrift für Naturforschung*  
422 *c* **36**, 910–912 (1981).
- 423 [26] Ganguli, D. & Simoncelli, E. P. Efficient Sensory Encoding and Bayesian Inference with Heterogeneous Neural  
424 Populations. *Neural Computation* **26**, 2103–2134 (2014).
- 425 [27] Litwin-Kumar, A. & Doiron, B. Formation and maintenance of neuronal assemblies through synaptic plasticity.  
426 *Nature communications* **5**, 1–12 (2014).
- 427 [28] Renart, A., Song, P. & Wang, X.-J. Robust spatial working memory through homeostatic synaptic scaling in  
428 heterogeneous cortical networks. *Neuron* **38**, 473–485 (2003).
- 429 [29] Kilpatrick, Z. P., Ermentrout, B. & Doiron, B. Optimizing Working Memory with Heterogeneity of Recurrent  
430 Cortical Excitation. *The Journal of Neuroscience* **33**, 18999–19011 (2013).
- 431 [30] Pollock, E. & Jazayeri, M. Engineering recurrent neural networks from task-relevant manifolds and dynamics.  
432 *PLOS Computational Biology* **16** (2020).
- 433 [31] Louie, K. & Glimcher, P. W. Efficient coding and the neural representation of value. *Annals of the New York*  
434 *Academy of Sciences* **1251**, 13–32 (2012).
- 435 [32] Heider, E. R. Universals in color naming and memory. *Journal of Experimental Psychology* **93**, 10–20 (1972).
- 436 [33] Hansen, B. C. & Essock, E. A. A horizontal bias in human visual processing of orientation and its correspondence  
437 to the structural components of natural scenes. *Journal of Vision* **4** (2004).
- 438 [34] Goldman-Rakic, P. S. Cellular and circuit basis of working memory in prefrontal cortex of nonhuman primates.  
439 *Progress in brain research* **85**, 325–336 (1991).
- 440 [35] Bays, P. M., Catalao, R. F. & Husain, M. The precision of visual working memory is set by allocation of a shared  
441 resource. *Journal of vision* **9**, 7–7 (2009).
- 442 [36] Burak, Y. & Fiete, I. R. Fundamental limits on persistent activity in networks of noisy neurons. *Proceedings of the*  
443 *National Academy of Sciences* **109**, 17645–17650 (2012).

- 444 [37] Itskov, V., Hansel, D. & Tsodyks, M. Short-term facilitation may stabilize parametric working memory trace.  
445 *Frontiers in computational neuroscience* **5**, 40 (2011).
- 446 [38] Kilpatrick, Z. P. & Ermentrout, B. Wandering bumps in stochastic neural fields. *SIAM Journal on Applied Dynam-*  
447 *ical Systems* **12**, 61–94 (2013).
- 448 [39] Schapiro, K., Josić, K., Kilpatrick, Z. P. & Gold, J. I. Strategy-dependent effects of working-memory limitations  
449 on human perceptual decision-making. *Elife* **11**, e73610 (2022).
- 450 [40] Durstewitz, D., Seamans, J. K. & Sejnowski, T. J. Neurocomputational models of working memory. *Nature*  
451 *neuroscience* **3**, 1184–1191 (2000).
- 452 [41] Koulakov, A. A., Raghavachari, S., Kepecs, A. & Lisman, J. E. Model for a robust neural integrator. *Nature*  
453 *neuroscience* **5**, 775–782 (2002).
- 454 [42] Lindner, B., Kostur, M. & Schimansky-Geier, L. Optimal diffusive transport in a tilted periodic potential. *Fluct*  
455 *Noise Lett* **1**, R25–R39 (2002).
- 456 [43] Amari, S.-i. Dynamics of pattern formation in lateral-inhibition type neural fields. *Biological cybernetics* **27**, 77–87  
457 (1977).
- 458 [44] Bhalla, U. S. Molecular computation in neurons: a modeling perspective. *Current opinion in neurobiology* **25**,  
459 31–37 (2014).
- 460 [45] Benna, M. K. & Fusi, S. Computational principles of synaptic memory consolidation. *Nature neuroscience* **19**,  
461 1697–1706 (2016).
- 462 [46] Zenke, F. & Gerstner, W. Hebbian plasticity requires compensatory processes on multiple timescales. *Philosophical*  
463 *Transactions of the Royal Society B: Biological Sciences* **372**, 20160259 (2017).
- 464 [47] Lev-Ram, V., Wong, S. T., Storm, D. R. & Tsien, R. Y. A new form of cerebellar long-term potentiation is  
465 postsynaptic and depends on nitric oxide but not camp. *Proceedings of the National Academy of Sciences* **99**,  
466 8389–8393 (2002).
- 467 [48] Wei, X.-X. & Stocker, A. A. A Bayesian observer model constrained by efficient coding can explain 'anti-Bayesian'  
468 percepts. *Nature Neuroscience* **18**, 1509–1517 (2015).
- 469 [49] Bae, G.-Y., Olkkonen, M., Allred, S. R., Wilson, C. & Flombaum, J. I. Stimulus-specific variability in color  
470 working memory with delayed estimation. *Journal of Vision* **14**, 7 (2014).
- 471 [50] Pratte, M. S., Park, Y. E., Rademaker, R. L. & Tong, F. Accounting for stimulus-specific variation in precision  
472 reveals a discrete capacity limit in visual working memory. *Journal of Experimental Psychology: Human Perception*  
473 *and Performance* **43**, 6–17 (2017).

- 474 [51] de Gardelle, V., Kouider, S. & Sackur, J. An oblique illusion modulated by visibility: Non-monotonic sensory  
475 integration in orientation processing. *Journal of Vision* **10**, 6 (2010).
- 476 [52] Bae, G.-Y. & Luck, S. J. Interactions between visual working memory representations. *Attention, Perception, &*  
477 *Psychophysics* **79**, 2376–2395 (2017).
- 478 [53] Golomb, J. D. Divided spatial attention and feature-mixing errors. *Attention, Perception, & Psychophysics* **77**,  
479 2562–2569 (2015).
- 480 [54] Bae, G.-Y. Breaking the cardinal rule: The impact of interitem interaction and attentional priority on the cardinal  
481 biases in orientation working memory. *Attention, Perception, & Psychophysics* (2021).
- 482 [55] Bays, P. M. Evaluating and excluding swap errors in analogue tests of working memory. *Scientific Reports* **6**, 19203  
483 (2016).
- 484 [56] Tang, H. *et al.* Prefrontal cortical plasticity during learning of cognitive tasks. *Nature Communications* **13**, 90  
485 (2022).
- 486 [57] Ben-Yishai, R., Hansel, D. & Sompolinsky, H. Traveling waves and the processing of weakly tuned inputs in a  
487 cortical network module. *Journal of computational neuroscience* **4**, 57–77 (1997).
- 488 [58] Salin, P. A., Malenka, R. C. & Nicoll, R. A. Cyclic amp mediates a presynaptic form of ltp at cerebellar parallel  
489 fiber synapses. *Neuron* **16**, 797–803 (1996).
- 490 [59] Kwon, H.-B. & Sabatini, B. L. Glutamate induces de novo growth of functional spines in developing cortex. *Nature*  
491 **474**, 100–104 (2011).
- 492 [60] Royer, S. & Paré, D. Conservation of total synaptic weight through balanced synaptic depression and potentiation.  
493 *Nature* **422**, 518–522 (2003).
- 494 [61] Roth-Alpermann, C., Morris, R. G., Korte, M. & Bonhoeffer, T. Homeostatic shutdown of long-term potentiation  
495 in the adult hippocampus. *Proceedings of the National Academy of Sciences* **103**, 11039–11044 (2006).

## Supplementary Materials

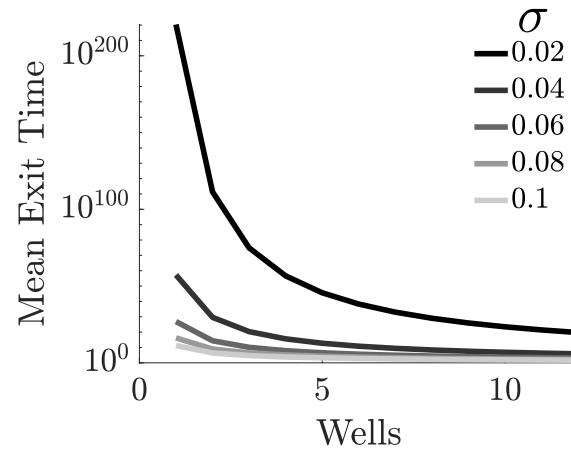

Figure S1: Mean exit time for a particle to leave the current well of attraction. Computed as in [29, 42]. Parameters as listed in Methods Table 1.

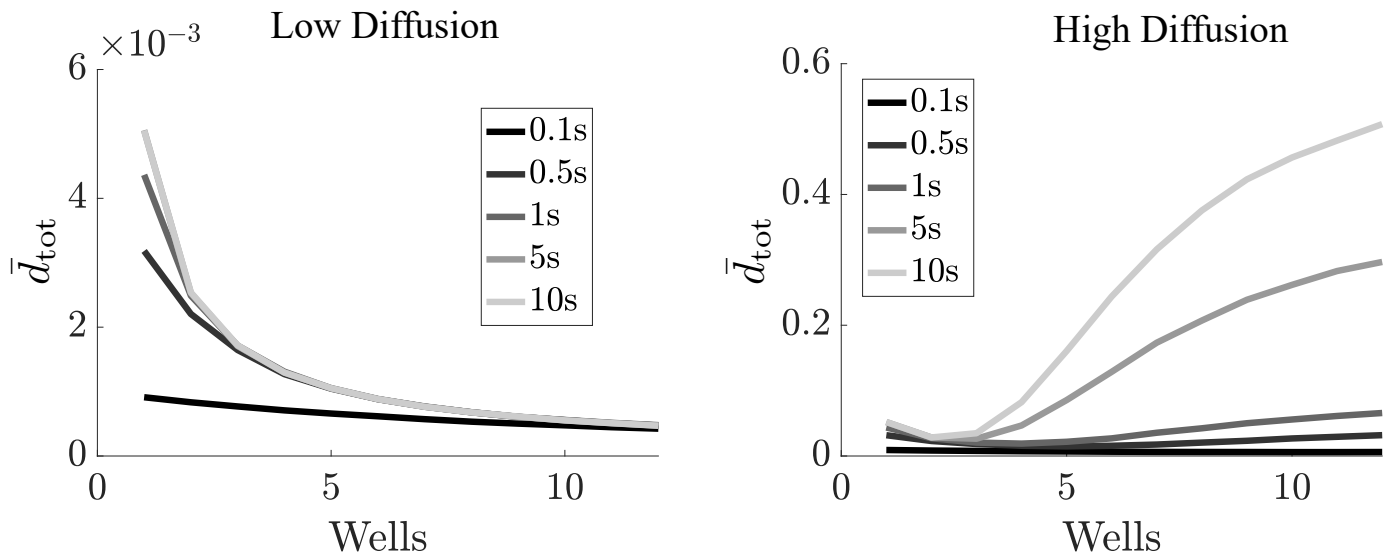

Figure S2: Total mean distortion in a heterogeneous landscape with only diffusion (targets sampled at attractor points), low diffusion ( $\sigma = 0.01$ , left) and high diffusion ( $\sigma = 0.1$ , right). Parameters as listed in Methods Table 1.

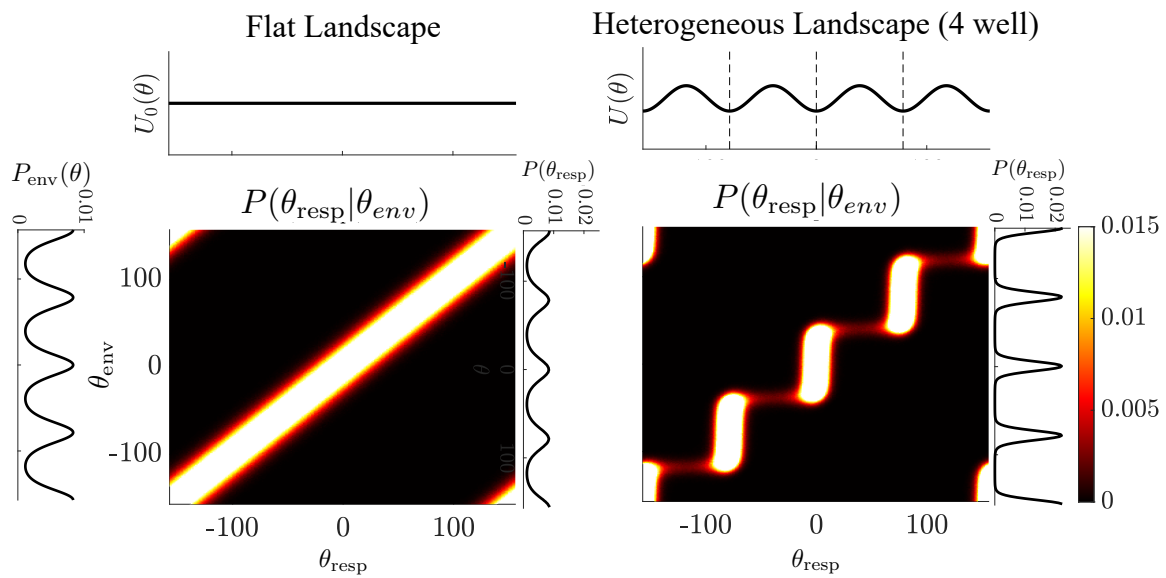

Figure S3: Comparing energy landscapes ( $U(\theta)$ ) and heterogeneous feature value distribution ( $P_{env}(\theta)$ ), we find the conditional probability of response  $P(\theta_{resp}|\theta_{env})$  and the marginal probability of response  $P(\theta_{resp})$  for particle models with homogeneous and heterogeneous (four wells at environmental distribution peaks) landscapes. Parameters as listed in Methods Table 1.

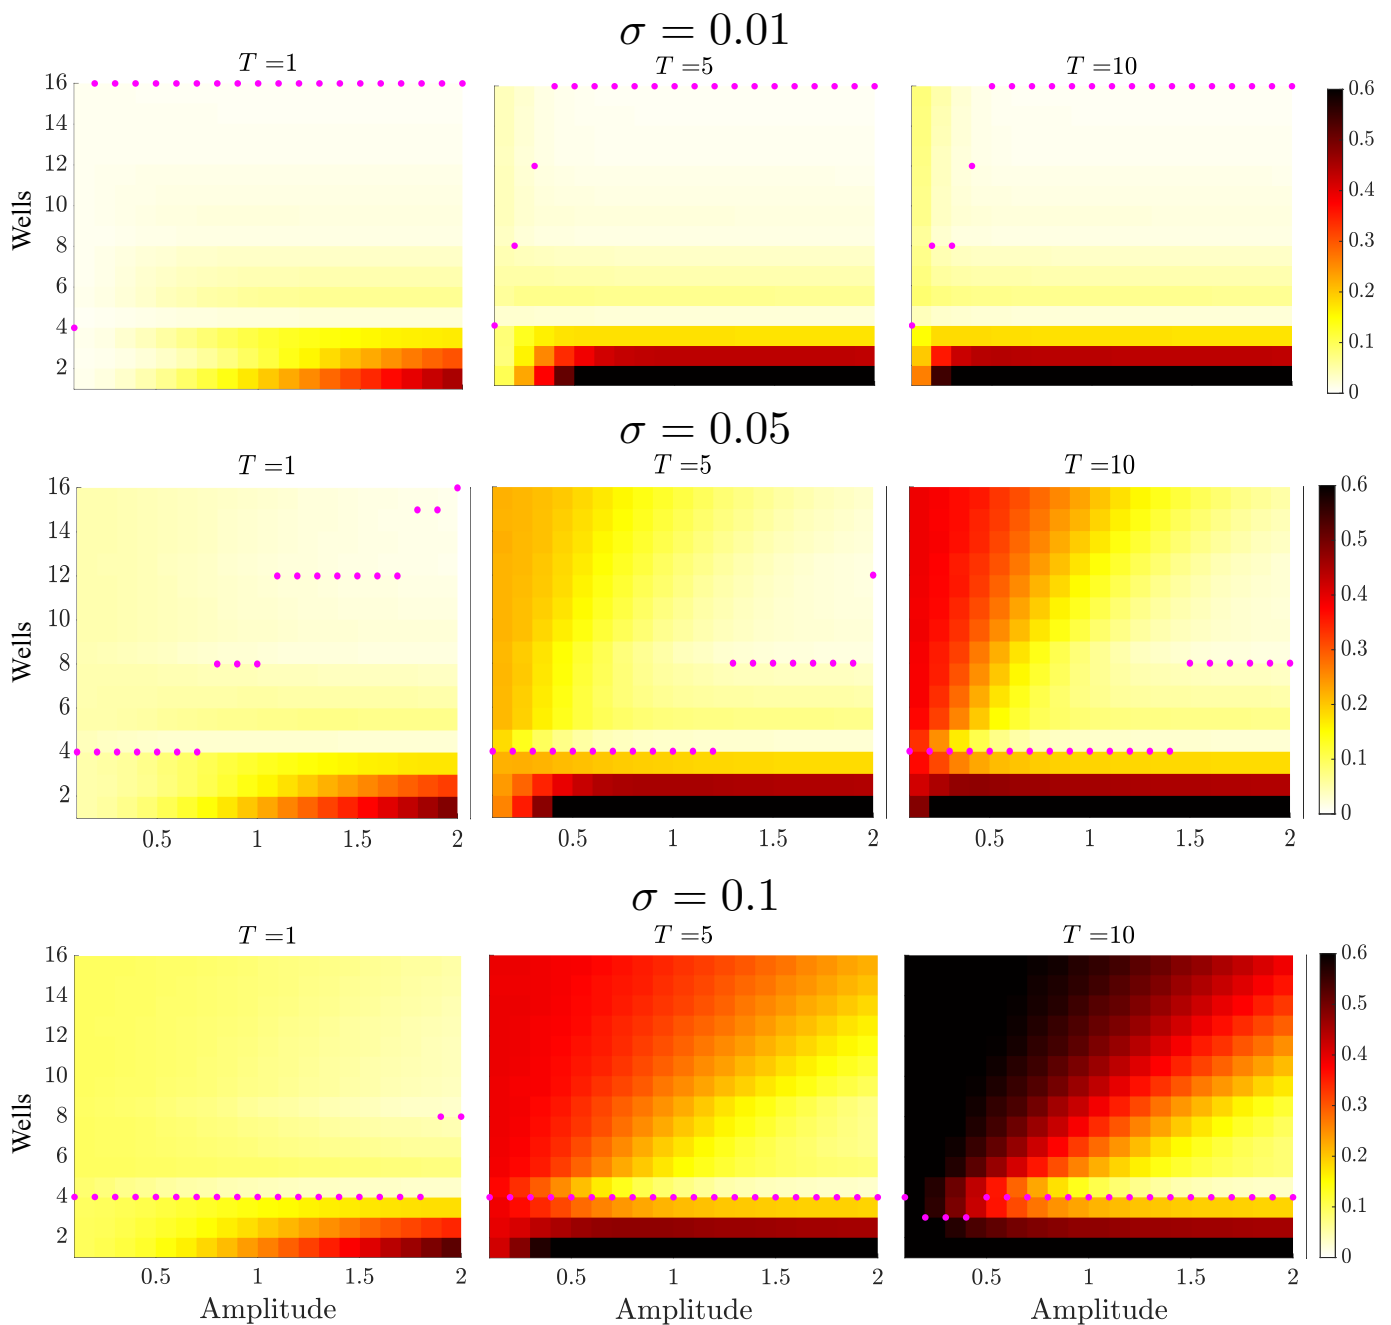

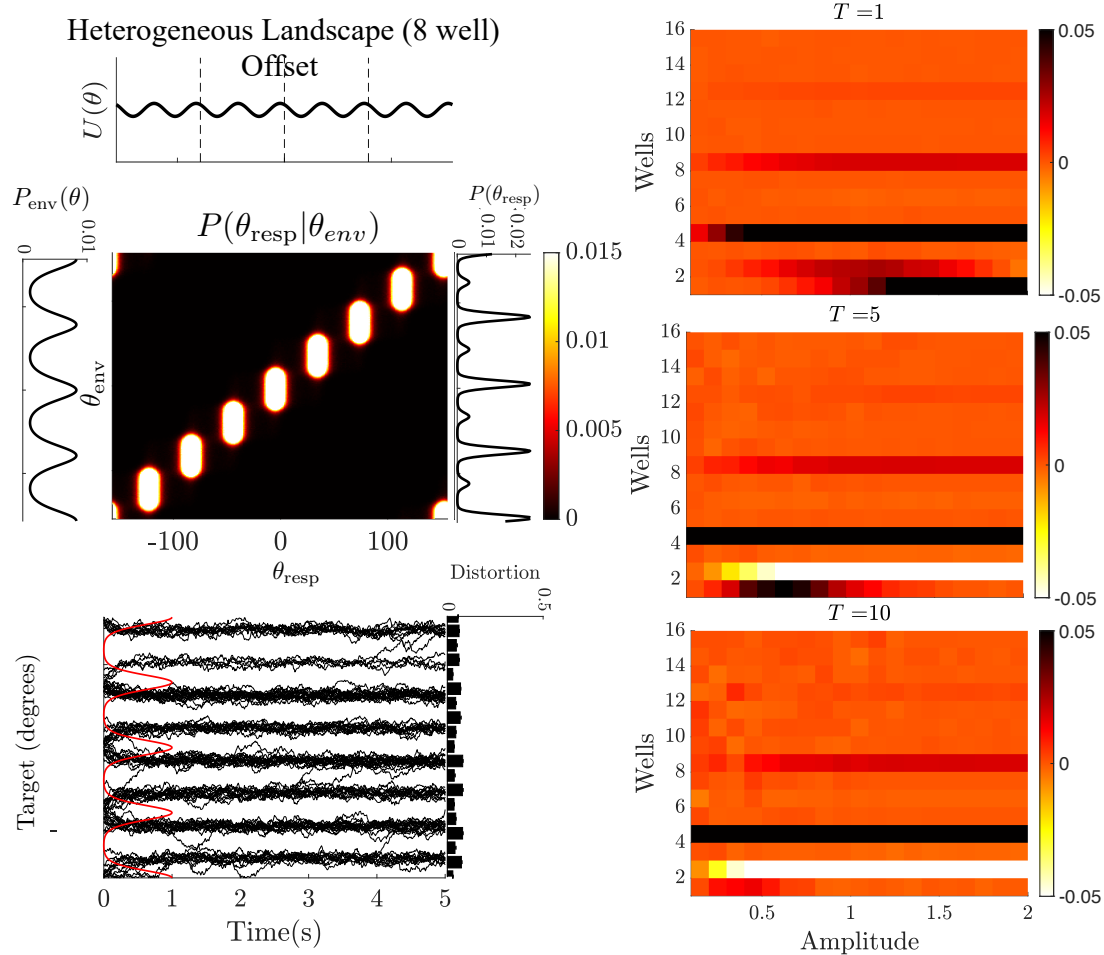

Figure S5: Left: The conditional and marginal probabilities when the heterogeneous particle model has more wells than the environment and offset from the peak locations. This offset leads memoranda to drift to offset locations and shows moderate distortion for all values of  $\theta$ . Right: Total mean distortion in offset heterogeneous particle models as compared to non-offset models for moderate diffusion ( $\sigma = 0.05$ ). Positive values corresponds with higher levels of distortion in offset models. Parameters:  $T_{Delay} = 1$ ,  $n = 8$  offset = 45, all others as listed in Methods Table 1.

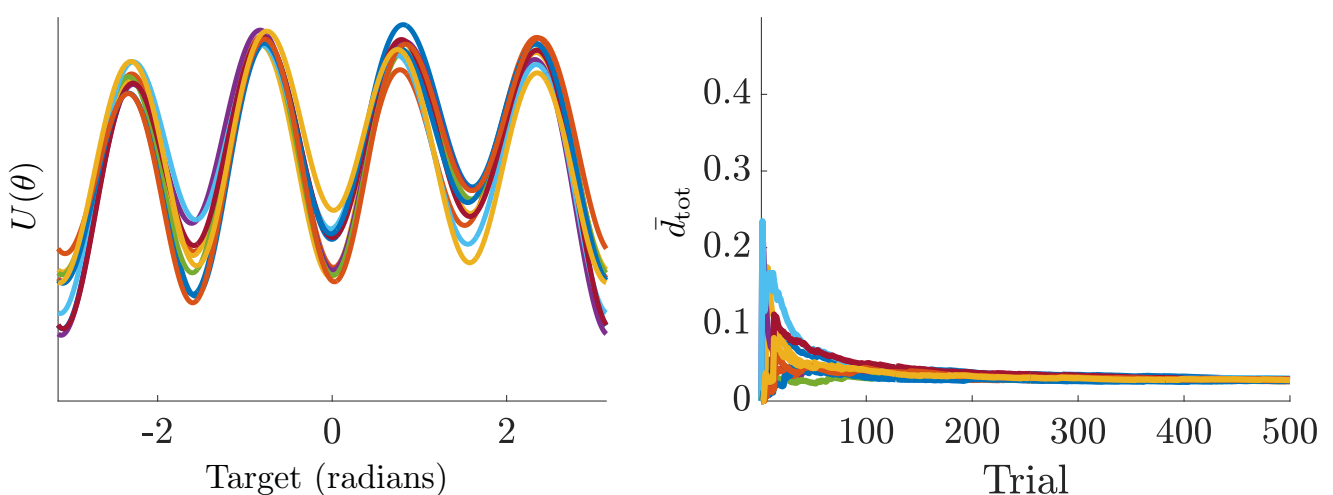

Figure S6: Ordering of observations in the learning particle model does not change the shape of the learned landscape or overall distortion. Left: 10 iterations of the learning model with the same observations but randomized permutations produce potential landscapes with the same shape but differing amplitudes. Right: 10 iterations of the learning model with no diffusion (drift only) and the same observations but randomized permutations show the same overall mean distortion after many trials with minor variations in the learning rate. Parameters used:  $\sigma = 0$ , all others as listed in Methods Table 1..

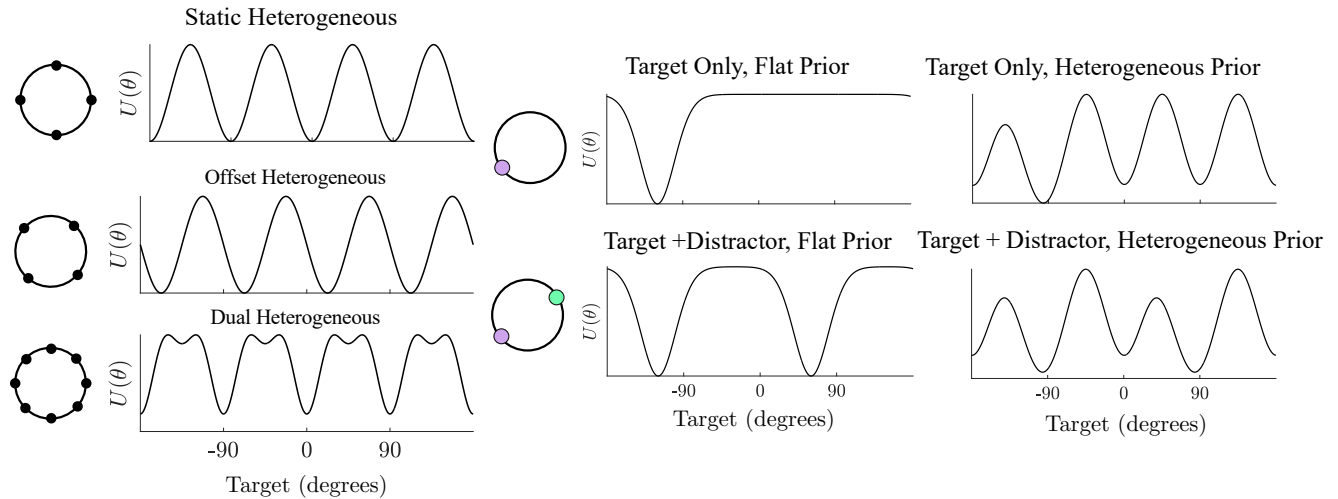

Figure S7: Left: All fixed heterogeneous models. Static Heterogeneous model includes three free parameters: amplitude, number of wells, and diffusion. Offset Heterogeneous includes amplitude and number of wells, diffusion, and one additional parameter for offset. Dual heterogeneous considers five parameters: amplitude and number of wells for the first component, amplitude and number of wells for the second component, and diffusion. Right: Learning particle models. Each updates iteratively based on three parameters: width of the bump, depth of the bump, and diffusion. Target-Only learning incorporated only the target prompted for response, and Target+ Distractor incorporated both items. Priors refer to initial landscape, beginning either with a homogeneous (flat) landscape or a heterogeneous landscape that matched the human population biases. Parameter ranges as listed in Methods Table 2

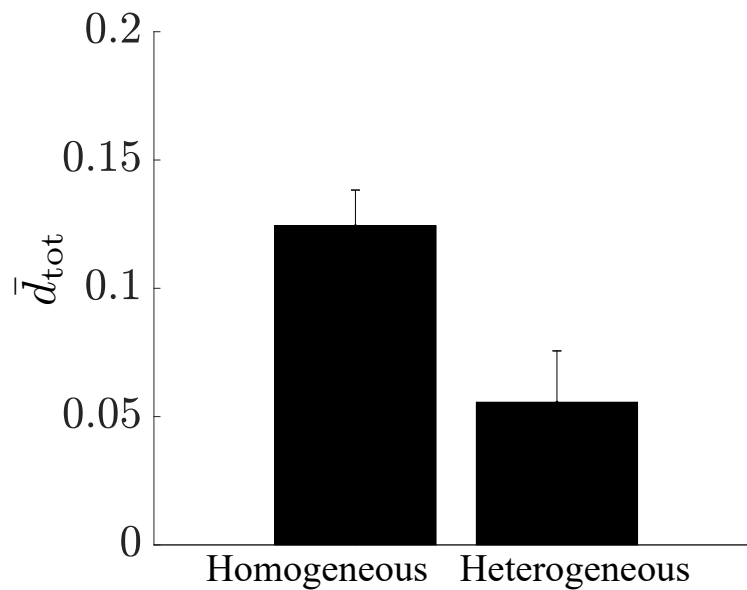

Figure S8: Total mean distortion in the homogeneous and fixed environment-matched heterogeneous neural field models. Bootstrapped averages ( $N_{Boot} = 1e3$ ) show a significant decrease in distortion for the heterogeneous synaptic connectivity. All model parameters as listed in Methods Table 3.
